1

2

3

4

5

## Cognition across the lifespan: Aging and gender differences

6

7 Nichols, E. S.<sup>a,b\*</sup>, Wild, C. J.<sup>b</sup>, Owen, A. M.<sup>b,c,d</sup>, & Soddu, A.<sup>a,b</sup>

8

9 <sup>a</sup>The Department of Physics and Astronomy, the University of Western Ontario, London, Ontario,

10 Canada

11 <sup>b</sup>Brain and Mind Institute, the University of Western Ontario, London, Ontario, Canada

12 <sup>c</sup>The Department of Physiology and Pharmacology, the University of Western Ontario, London,

13 Ontario, Canada

14 <sup>d</sup>The Department of Psychology, the University of Western Ontario, London, Ontario, Canada

15

16 \* Corresponding author

17 E-mail: [enicho4@uwo.ca](mailto:enicho4@uwo.ca) (ESN)

18

19

20

## 21 **Abstract**

22 Maintaining cognitive health across the lifespan has been the focus of a multi-billion-dollar industry.  
23 In order to guide treatment and interventions, a clear understanding of the way that proficiency in  
24 different cognitive domains develops and declines across the lifespan is necessary. Additionally, there  
25 are gender differences in a range of other factors, such as anxiety and substance use, that are also  
26 known to affect cognition, although the scale of this interaction is unknown. Our objective was to  
27 assess differences in cognitive function across the lifespan in men and women in a large,  
28 representative sample. Over 45,000 individuals were tested on 12 cognitive tasks. Segmented  
29 regression was used to model the trajectory of three cognitive domains: short-term memory, verbal  
30 abilities, and reasoning. Each domain showed a unique trajectory, suggesting that not all cognitive  
31 abilities develop and decline in the same way. Gender differences were found in all three domains;  
32 however, after controlling for socio-demographic factors, these differences were greatly reduced or  
33 disappeared. These results suggest that the trajectory of cognition across the lifespan differs for men  
34 and women, but is greatly influenced by environmental factors. We discuss these findings within a  
35 framework that describes gender differences in cognition as likely guided by a complex interplay  
36 between biology and environment.

37

## 38 **Introduction**

39 By 2020, roughly 22% of the world's population will be over 65, a total of approximately 1.7  
40 billion people [1]. The consequences of our aging population are many, including an increasing focus  
41 on maintaining cognitive health; more so than ever before, individuals are seeking ways to keep their

42 minds sharp. This new interest in maintaining cognitive health and reversing, or stalling, normal  
43 cognitive decline has led to the creation of billion-dollar industry, promoting products as wide-ranging  
44 as “brain training” software and pharmaceutical interventions such as nootropics. Yet, in order to be  
45 able to evaluate these approaches as potential tools and treatments, it is important that we first have  
46 a clear understanding of how cognition changes across the lifespan in average, healthy individuals.  
47 Additionally, because of the often-cited cognitive differences between women and men [2–5], it is  
48 important to characterize cognition in each population; if gender differences in cognitive abilities do  
49 exist, then men and women may respond differently to cognitive aging interventions.

50           In healthy individuals, cognitive abilities develop rapidly throughout childhood. By six, most  
51 children have developed some degree of inhibitory control, verbal fluency, and task switching [6–8].  
52 By twelve, they are able to plan and organize, and use conceptual strategies and reasoning [9]. In  
53 adolescence, these abilities continue to develop, with most teenagers having good attentional  
54 control, verbal fluency, and processing speed [6]. By 18, executive function is thought to be mature  
55 [10], although research suggests that some processes continue to develop in early adulthood [11].  
56 Young adulthood is where most researchers agree that cognitive abilities peak; however there is large  
57 variability within this period across different cognitive functions [6,11]. Mid to late adulthood is then  
58 characterized by a slow decline in most cognitive abilities [8,12], and while it can be problematic, this  
59 decline is considered part of healthy aging.

60           Differences in cognitive abilities between men and women are less clear; although several  
61 gender disparities in cognitive abilities appear to exist, recent studies have found these differences to  
62 be mediated by underlying factors related to gender, rather than being inherent to gender itself. For  
63 example, during childhood, girls are thought to develop faster than boys in verbal fluency and

64 information processing [2,3], and boys are thought to develop faster than girls in spatial reasoning,  
65 working memory, and number processing [4,13]. However, Tzuriel and Egozi [14] found that gender  
66 differences in mental rotation disappeared after visuospatial training. Similarly, Krinzinger and  
67 colleagues [15] found that number processing advantages in boys were mediated by attitudes toward  
68 mathematics, and similar results have been found in young adults [16]. Differences in verbal  
69 processing have been less clear, with some suggesting that they are due to variability in instruction  
70 and strategy [17,18], and others suggesting a hormonal link [19,20]. Reports of gender differences in  
71 age-related cognitive decline are largely thought to be the result of cohort effects [21–23], although  
72 others have found gender-specific links to brain-derived neurotrophic factor [24] and brain metabolic  
73 activity [25]. Realistically, the truth likely lies somewhere in between, with a multifaceted interaction  
74 of biology and environment [25,26].

75 Finally, there are a number of sociodemographic factors known to affect cognition. For  
76 example, socioeconomic status (SES) and its relationship with cognitive abilities has been widely  
77 studied; it is generally agreed that higher SES predicts better performance on cognitive tasks [27,28].  
78 Additionally, anxiety, depression, and substance abuse also have known detrimental effects on  
79 cognition, with higher levels of all three being associated with poorer cognitive outcomes [29–31].  
80 Such sociodemographic factors also interact with gender; women tend to experience higher levels of  
81 anxiety [32] and depression [33], while men tend to experience higher levels of substance abuse [34],  
82 although women may be more at risk specifically for alcohol abuse (35, but see 36). Thus, there is a  
83 complex interaction of age, gender, and other sociodemographic variables that must be considered  
84 when studying cognitive abilities across the lifespan.

85           The internet provides a unique opportunity for examining cognition across the lifespan in the  
86   general population on a huge scale, allowing data to be sampled from participants from a broad range  
87   of SES, geographical, and educational backgrounds. There is a growing body of evidence to suggest  
88   that online cognitive assessment is as reliable as in-person pen-and-paper testing [11,37], addressing  
89   concerns that data collected in this manner may not be valid. Leveraging the power of the internet  
90   provides us with a cross-sectional snapshot of both demographics and cognition from a larger and  
91   more diverse sample than would be possible to collect in the laboratory.

92           The first goal of the present study was to characterize cognitive abilities across the lifespan,  
93   ranging from adolescence to late adulthood. Specifically, we sought to address whether differences  
94   exist between cognitive domains; do memory and reasoning show the same pattern, or do they peak  
95   at different ages? Do reasoning and verbal abilities show the same rate of decline, or does one remain  
96   resilient to aging more so than the other? The second goal was to examine whether these age effects  
97   differed between genders, and what factors may influence these differences. Specifically, we sought  
98   to address whether differences exist in some cognitive domains and not others, whether men and  
99   women peak at the same age, and whether they decline at the same rate. Further, we explored the  
100   demographic and social factors that affect the genders differently, and whether controlling for these  
101   differences affects the observed pattern of cognitive abilities across the lifespan. Based on smaller  
102   studies using more limited time windows, we predicted that gender differences would manifest with  
103   men outperforming women in memory and reasoning, but with women outperforming men in verbal  
104   abilities, and that the pattern of these abilities would show an increase up to early adulthood, and a  
105   slow decline into mid and late adulthood. By taking into account studies of the effects of mental

106 health and sociodemographic variables on cognition, we also predicted that controlling for these  
107 factors would eliminate gender differences in cognitive abilities.

## 108 **Materials and methods**

### 109 **Participants**

110 All data for this study were collected with the CBS (www.  
111 cambridgebrainsciences.com) online platform, which has previously been used for other large-scale  
112 studies of cognition [38,39]. A total of 65,994 participants registered and completed all portions of the  
113 study, with a final number of 45,779 being included after removing outliers and rows with missing  
114 data (described in the data preprocessing section below). A summary of the final sample's  
115 demographics is included in Table 1, broken down by gender. All participants gave informed consent,  
116 and ethics approval was obtained through the Cambridge Psychology Research Ethics Committee  
117 (2010.62).

**Table 1. Comparison of demographic variables across women and men.**

| Measure                     | Mean (SD) or Percentage |               | $t(df)$ , $W$ , $\chi^2(df, N)^1$ | $p$    | Effect size <sup>2</sup> |
|-----------------------------|-------------------------|---------------|-----------------------------------|--------|--------------------------|
|                             | Women                   | Men           |                                   |        |                          |
| <i>N</i>                    | 13,444                  | 32,335        |                                   |        |                          |
| Age (years)                 | 28.08 (11.01)           | 28.22 (10.30) | -1.31(23,696)                     | 0.220  | -0.01                    |
| Sleep (hours per night)     | 7.09 (1.64)             | 6.93 (1.64)   | 9.51(25,241)                      | < .001 | 0.10                     |
| Alcohol (units per week)    | 1.72 (1.85)             | 1.78 (2.00)   | -3.10 (27,022)                    | .003   | -0.03                    |
| Caffeine (units per day)    | 3.24 (4.69)             | 4.22 (5.53)   | -19.36 (29,414)                   | < .001 | -0.19                    |
| Cigarettes (per day)        | 1.48 (4.54)             | 1.71 (5.06)   | -4.68 (27,830)                    | < .001 | -0.05                    |
| Highest education completed |                         |               | 2.17e <sup>8</sup>                | .989   | 6.27e <sup>-5</sup>      |
| Some high school            | 10.20%                  | 9.80%         |                                   |        |                          |
| High School                 | 8.40%                   | 10.60%        |                                   |        |                          |
| Some post-secondary         | 27.80%                  | 30.50%        |                                   |        |                          |
| Post-secondary degree       | 27.20%                  | 27.70%        |                                   |        |                          |
| Professional degree         | 26.40%                  | 21.40%        |                                   |        |                          |

|                      |        |        |                    |        |                    |
|----------------------|--------|--------|--------------------|--------|--------------------|
| Level of employment  |        |        | 2.21e <sup>8</sup> | .003   | 0.01               |
| No answer            | 4.10%  | 2.70%  |                    |        |                    |
| Unemployed           | 10.30% | 12.10% |                    |        |                    |
| Full time student    | 28.70% | 25.40% |                    |        |                    |
| Employed and student | 15.50% | 11.90% |                    |        |                    |
| Employed part time   | 10.00% | 6.20%  |                    |        |                    |
| Employed full time   | 31.40% | 41.80% |                    |        |                    |
| Exercise             |        |        | 2.18e <sup>8</sup> | .974   | 5.35e <sup>4</sup> |
| Never                | 10.60% | 11.00% |                    |        |                    |
| Infrequently         | 37.80% | 34.70% |                    |        |                    |
| Weekly               | 19.90% | 18.20% |                    |        |                    |
| Several times a week | 25.30% | 28.30% |                    |        |                    |
| Every day            | 6.50%  | 7.90%  |                    |        |                    |
| Depressive feelings  |        |        | 2.36e <sup>8</sup> | < .001 | 0.07               |
| No answer            | 1.10%  | 1.10%  |                    |        |                    |
| Never                | 10.40% | 17.50% |                    |        |                    |
| Occasionally         | 56.80% | 54.00% |                    |        |                    |
| Quite often          | 21.40% | 18.20% |                    |        |                    |
| Nearly every day     | 7.30%  | 6.40%  |                    |        |                    |
| All the time         | 3.10%  | 2.80%  |                    |        |                    |
| Anxiety              |        |        | 2.58e <sup>8</sup> | < .001 | 0.15               |
| No answer            | 1.30%  | 1.50%  |                    |        |                    |
| Never                | 13.00% | 24.00% |                    |        |                    |
| Occasionally         | 48.80% | 49.90% |                    |        |                    |
| Quite often          | 21.20% | 14.80% |                    |        |                    |
| Nearly every day     | 10.80% | 6.50%  |                    |        |                    |
| All the time         | 5.00%  | 3.20%  |                    |        |                    |
| Video games          |        |        | 2.42e <sup>9</sup> | < .001 | 0.09               |
| Never                | 38.00% | 17.10% |                    |        |                    |
| Monthly              | 26.00% | 20.30% |                    |        |                    |
| Weekly               | 21.40% | 29.40% |                    |        |                    |
| Daily                | 14.60% | 33.20% |                    |        |                    |
| Siblings             |        |        | 2.19e <sup>8</sup> | .111   | 0.01               |
| Only child           | 12.40% | 10.60% |                    |        |                    |
| Youngest             | 30.40% | 31.00% |                    |        |                    |
| Middle               | 16.40% | 17.40% |                    |        |                    |
| Oldest               | 40.80% | 41.00% |                    |        |                    |
| Religiosity          |        |        | 2.34e <sup>8</sup> | < .001 | 0.06               |
| Atheist              | 31.90% | 42.40% |                    |        |                    |
| Agnostic             | 31.50% | 31.50% |                    |        |                    |

|                      |        |        |                        |        |      |
|----------------------|--------|--------|------------------------|--------|------|
| Religious lapsed     | 19.50% | 15.10% |                        |        |      |
| Religious practicing | 13.10% | 8.10%  |                        |        |      |
| Very religious       | 3.90%  | 2.90%  |                        |        |      |
| Political leaning    |        |        | 68.67(2, N = 45,779)   | < .001 | 0.04 |
| Liberal              | 47.20% | 44.90% |                        |        |      |
| Middle               | 45.20% | 45.10% |                        |        |      |
| Conservative         | 7.60%  | 10.00% |                        |        |      |
| Tech savvy           |        |        | 2693.40(1, N = 45,779) | < .001 | 0.24 |
| Yes                  | 64.00% | 89.10% |                        |        |      |
| No                   | 36.00% | 10.90% |                        |        |      |

<sup>1</sup>Welch's *t*-test used to compare numeric variables, Wilcoxon Rank-Sum used to compare ordinal variables, and  $\chi^2$  used to compare categorical variables

<sup>2</sup>Effect sizes used were Cohen's *d* for *t*-tests, *r* for Wilcoxon Rank-Sum tests, and Cramer's *V* for  $\chi^2$  tests

118

## 119 **Materials**

### 120 **Sociodemographic questionnaire**

121       The sociodemographic questionnaire included questions about the individual's age and  
122 gender, lifestyle such as exercise, substance use, and sleep, mental health such as depressive  
123 symptoms and anxiety, and other demographics such as education, employment, and level of  
124 technical savviness. Demographics included in the present study are listed in Table 1. Demographic  
125 information collected but not of interest here included country of birth, hours slept the night before  
126 completing the study, and favourite type of music. The full demographic questionnaire is available in  
127 Appendix 1.

### 128 **Cognitive battery**

129       Prior to filling in the questionnaire, participants completed the 12 tests in the CBS test battery.  
130 Test order was fixed across participants. Detailed descriptions of the tests can be found in the  
131 Supplementary Material of Hampshire et al. [31], but in brief they are: (1) 'Monkey Ladder'



132 (visuospatial working memory); (2) 'Grammatical Reasoning' (verbal reasoning); (3) 'Double Trouble'  
133 (a modified Stroop task); (4) 'Odd One Out' (deductive reasoning); (5) 'Spatial Span' (short-term  
134 memory); (6) 'Rotations' (mental rotation); (7) 'Feature Match' (feature-based attention and  
135 concentration); (8) 'Digit Span' (verbal working memory); (9) 'Spatial Planning' (planning and  
136 executive function); (10) 'Paired Associates' (shape-location associative memory); (11) 'Interlocking  
137 Polygons' (visuospatial processing); and (12) 'Token Search' (working memory and strategy).

## 138 **Factor analysis**

139         Imaging studies have underscored the fact that there is rarely a one-to-one mapping between  
140 cognitive functions and the brain areas, or networks, that underpin them. One approach to this issue  
141 is to examine the complex statistical relationships between performance on any one cognitive task (or  
142 group of tasks), and changes in brain activity to reveal how one is related to the other. In order to do  
143 this most effectively, large amounts of data need to be included because of the natural variance in  
144 cognitive performance (and brain activity) across tests and across individuals. In the age of  
145 computerized internet testing and so-called 'big data', this problem becomes much easier to solve.  
146 Hampshire et al. [31] collected data on the 12 CBS tasks from 45,000 participants. These data were  
147 then subjected to a factor analysis and 3 discrete factors relating to overall cognitive performance  
148 were identified. Each one of these factors represents an independent cognitive function that is best  
149 described by a combination of performance on multiple tests, something that no single test can  
150 assess, and were labeled as encapsulating aspects of short-term memory, reasoning, and verbal  
151 abilities, respectively. This technique allows an individual's performance to be compared to a very  
152 large normative database in terms of these descriptive factors rather than performance on a single  
153 test.

154 Here, the same 12 tests were used to create three “composite” scores reflecting performance  
155 based on the factor analysis by Hampshire and colleagues , and the three composite scores were  
156 calculated as follows. First, the 12 individual test scores were normalized ( $M = 0.0$ ,  $SD = 1.0$ ). Then,  
157 the three cognitive domain scores were calculated using the formula  $Y = X(Ar^+)^T$ , where  $Y$  is the  $N \times 3$   
158 matrix of domain scores,  $X$  is the  $N \times 12$  matrix of test z-scores,  $Ar$  is the  $12 \times 3$  matrix of varimax-  
159 rotated principal component weights (i.e., factor loadings) from Hampshire et al. All 12 tests  
160 contributed to each domain score, as determined by their component weights. Because scores were  
161 demeaned, a domain score of 0.0 is the mean of the population that was used to derive the loadings.  
162 Thus, a score above zero indicates that someone is above average.

## 163 **Data preprocessing**

164 Only data from the participants who completed all questionnaire items and all 12 tests were  
165 included in analysis. 65,994 participants met these requirements. Data were then cleaned to remove  
166 impossible and improbable questionnaire responses, removing 5,732 participants. Examples of  
167 improbable responses include smoking over 60 cigarettes per day, sleeping more than 17 hours the  
168 night before, or consuming more than 50 alcoholic drinks per day. Test scores were then filtered for  
169 outliers in two passes: scores greater than six standard deviations were assumed to be technical  
170 errors and were first removed, eliminating 7,298 participants. Then, scores greater than four standard  
171 deviations from the recalculated mean were identified, assumed to be performance outliers, and  
172 removed, eliminating 7,157 participants. Finally, individuals younger than 12 and older than 69 were  
173 removed because of low numbers outside of this age range, eliminating 28 participants. 45,779  
174 participants were included in the final analysis.

## 175 **Statistical analyses**

176 Data were analyzed in R (version 3.5.2, R Core Team, 2018) and RStudio (version 1.1.463).  
177 Specific packages included: ‘Segmented’ [40] for computing regressions with breakpoints, ‘MatchIt’  
178 [41] for matching samples on demographic variables, ‘parallel’ for parallel computing, and ‘boot’ [42]  
179 for calculating confidence intervals. Figs were produced using ‘ggplot2’ [43].

180 To examine the differences in demographic variables between genders, three different tests  
181 were used: Welch’s *t*-tests for continuous variables, Wilcoxon Rank Sum tests for ordinal variables,  
182 and chi-square tests for categorical variables. *P*-values were corrected for multiple comparisons using  
183 a false discovery rate and were considered significant at  $p < .05$ . Effect size was calculated using the  
184 appropriate measures for each test: Cohen’s *d* for *t*-tests, *r* for Wilcoxon Rank Sum tests, and  
185 Cramer’s *V* for chi-square tests. Results are included in Table 1. Measures of skew and kurtosis  
186 indicated that domain scores were normally distributed, and histograms are shown in Fig 1.

187  
188 **Fig 1. Histograms of domain scores by gender.** Dashed lines indicate mean.

189  
190 Segmented linear regression models were constructed to predict each of the 3 domain scores  
191 from participants’ reported age and were estimated using maximum likelihood estimation.  
192 Segmented regression was used to fit a model in which there is a change in the linear relationship –  
193 such as a “peak” that indicates a transition from increasing to decreasing performance with age –  
194 without imposing a pre-determined shape (e.g., quadratic or cubic) through adding one or more  
195 piecewise linear relationships [40,44]. The value of the independent variable (i.e., age) at which this  
196 change occurs is referred to as a breakpoint. The relationship between cognitive performance and age  
197 was modeled separately for each gender.

198           The segmented regression technique used here requires that the number of breakpoints, and  
199 (optionally) initial estimates of their locations, are provided. To determine the number of these points  
200 in each score, we fit each segmented regression model multiple times with one or more breakpoints  
201 and selected the model with the lowest Bayesian Information Criterion (BIC)[40,45]. The number of  
202 breakpoints was estimated separately for each domain score and gender. The algorithm converged on  
203 consistent breakpoint locations regardless of whether initial estimates were provided (from visual  
204 inspection of local regression curves, shown in Fig S1), or not. To confirm that a model with one or  
205 more breakpoints predicted the data better than a linear model, the Davies' test [46] was used to  
206 determine whether there was a statistically significant change in slope. The estimated breakpoint  
207 location was taken as the age at which there was peak performance in all regression models except  
208 for two cases. First, in men's verbal scores, in which there were two breakpoints and the breakpoint  
209 with the highest score was used as peak age. Second, in women's reasoning scores, in which the  
210 highest score was at the lower boundary of our age range. Slopes of the increasing and decreasing  
211 segments, as well as the middle segment for men's verbal scores, were obtained using the 'slope'  
212 function of the 'segmented' package, and 95% confidence intervals (CIs) were calculated for peak age,  
213 score at peak age, and all slopes.

214           Differences in these parameters between men and women were analyzed by bootstrapping  
215 with 10,000 replications the difference of the estimated parameter values from models that were  
216 separately estimated for men and women; that is, the sex-by- peak age, peak score, and slope  
217 interactions were evaluated using randomized bootstrapping, because estimation of breakpoint  
218 parameters in our segmented regression did not allow for interaction with other variables. On each  
219 bootstrap iteration, a random sample of 13,444 men were selected in order to match the female

220 sample size. To determine whether these values differed significantly between genders, the lower and  
221 upper 2.5% quantiles of the bootstrapped difference values were produced; if these bounds included  
222 zero, then it could be interpreted as no significant difference between the genders.

223 In segmented models where multiple breakpoints were deemed a better solution than a single  
224 point as determined using BIC, the increasing or decreasing portion of the curve (i.e., the data to the  
225 left or right of the “peak”) was characterized by two increasing or decreasing linear segments with  
226 different slopes (as can be seen in Fig 2C, women’s reasoning scores). In order to compare slopes  
227 between the genders in these cases, bootstrapping was conducted by fitting the segmented model,  
228 then calculating the average slope to the left (in the case of men’s verbal scores) or right (in the case  
229 of women’s reasoning scores) of the peak. The rest of the bootstrapping parameters were kept the  
230 same as described above, with 95% confidence intervals of the difference values being used to detect  
231 significant differences between genders.

## 232 **Post-hoc analyses**

233 Given the differences in demographic variables between the genders, a second set of analyses  
234 were run in samples matched across genders for all demographic variables included in Table 1. These  
235 follow-up analyses were performed because, although the genders do realistically differ on measures  
236 such as anxiety and sleep, such factors are known to affect cognition and may contribute variance to  
237 the domain scores. Because it is difficult to account for the strong collinearity between gender and  
238 our demographic variables, matching the samples on these variables allowed us to examine gender  
239 differences when controlling for differences in socio-demographic variables. Descriptive information  
240 for these two new samples is summarized in Table S1, and histograms of domain scores are shown in

241 Fig S2. Local regression curves are shown in Fig S3. The same set of analyses were performed as  
242 outlined in the section above.

## 243 **Results**

### 244 **Demographics**

245 As reported in Table 1, a total of 13,444 women and 32,335 men completed the relevant  
246 demographic questionnaire items and all 12 cognitive tests. Women and men differed on several  
247 demographic factors, but not for age, education, exercise, and number of siblings (all  $ps > 0.05$ ). While  
248 all significant  $p$ -values were  $\leq .003$ , the largest effect sizes were seen in hours of sleep (Cohen's  $d =$   
249  $0.10$ ), units of caffeine per day (Cohen's  $d = -0.19$ ), anxiety level (Wilcoxon's  $r = 0.15$ ), and technical  
250 savviness (Cramer's  $V = 0.24$ ).

### 251 **Cognitive domain scores – unmatched samples**

#### 252 **Short-term memory**

253 STM scores for each gender were submitted to segmented regression with age as the sole  
254 predictor, entered as a continuous variable. In both cases, the breakpoint corresponded to a peak;  
255 that is, a transition from increasing to decreasing performance with increasing age (Fig 2A). Results  
256 are reported in Table 2, and slopes with 95% CIs bounds that did not include zero were interpreted as  
257 a significant effect of age.

258

259 **Fig 2. Regression lines for STM, Verbal, and Reasoning scores across the lifespan, ranging from 12 to**  
260 **69 years of age.** 95% simultaneous confidence bands are shown in translucent colour around the line,  
261 and 95% confidence intervals for peak age are shown in translucent rectangles.

262

263 **Table 2: Segmented regression parameter estimates for age, from regression models estimated for**  
264 **each composite score, for models estimated with N = 45,779**

| Score     | Gender | Coef  | SE    | <i>t</i> | <i>p</i> |
|-----------|--------|-------|-------|----------|----------|
| STM       | Women  | 0.03  | 0.01  | 3.83     | < .001   |
|           | ΔAge   | -0.05 |       |          |          |
|           | Men    | 0.04  | 0.01  | 6.48     | < .001   |
|           | ΔAge   | -0.07 |       |          |          |
| Verbal    | Women  | 0.04  | 0.01  | 8.16     | < .001   |
|           | ΔAge   | -0.05 |       |          |          |
|           | Men    | 0.10  | 0.01  | 8.44     | < .001   |
|           | ΔAge1  | -0.09 |       |          |          |
|           | ΔAge2  | -0.02 |       |          |          |
| Reasoning | Women  | -0.01 | 0.001 | -9.62    | < .001   |
|           | ΔAge   | -0.01 |       |          |          |
|           | Men    | 0.003 | 0.004 | 0.73     | .468     |
|           | ΔAge   | -0.03 |       |          |          |

265 Note: *p*-values for delta parameters measured by Davies' test

266

267 A model with one breakpoint was found to best estimate women's memory scores. The peak  
268 in women's STM scores occurred at age 20.47 [95% CI = 19.39, 21.55], with a score of 0.02 [95% CI = -  
269 0.01, 0.05]. The slopes of the segments to the left and right of the breakpoint were 0.03 [95% CI =  
270 0.02, 0.05] and -0.02 [95% CI = -0.02, -0.02], respectively, indicating that age was a significant  
271 predictor of STM performance in these age ranges; specifically, increasing age was associated with  
272 increasing scores up to the age of 20 years, after which it was associated with decreasing  
273 performance. Davies' test for a change in slope was significant ( $p < .001$ ), indicating that the linear  
274 relationship changed at the breakpoint, as can be seen in Fig 2A.

275 Men's memory scores were also best estimated by a segmented model with one breakpoint.  
276 The peak in men's STM score occurred at age 20.48 [95% CI = 19.85, 21.12], with a score of 0.30 [95%  
277 CI = 0.29, 0.32]. Slope of the increasing segment was 0.04 [95% CI = 0.03, 0.05], and slope of the

278 decreasing segment was -0.024 [95% CI = -0.03, -0.02], showing a significant effect of age on STM  
 279 score in men. The change in slope was significant, as measured by the Davies' test ( $p < .001$ ).

280 In order to determine whether women and men differed in peak age, peak score, or increasing  
 281 and decreasing slopes, 95% quantiles of bootstrapped difference values were calculated for each  
 282 parameter. As can be seen in Table 3, there was no significant difference in the age at which women  
 283 and men peaked in STM performance. However, men reached a significantly higher overall score than  
 284 women at their peak ages, a difference of 0.28 standard deviations. When comparing how STM scores  
 285 increased leading up to peak age and how quickly they declined afterward, women and men did not  
 286 differ significantly.

287

288

289 **Table 3: Comparisons between genders on key measures of cognitive performance over the lifetime**

| Score     | Measure          | Women [95% CI]                       | Men [95% CI]                      | Difference [95% CI]       |
|-----------|------------------|--------------------------------------|-----------------------------------|---------------------------|
| STM       | Peak age         | 20.471 [19.388, 21.553]              | 20.482 [19.845, 21.119]           | -0.011 [-4.696, 3.441]    |
|           | Peak score       | 0.021 [-0.007, 0.049]                | 0.304 [0.286, 0.323]              | -0.283 [-0.331, -0.219]   |
|           | Increasing slope | 0.032 [0.015, 0.048]                 | 0.042 [0.029, 0.054]              | 0.010 [-0.071, 0.036]     |
|           | Decreasing slope | -0.023 [-0.025, -0.021]              | -0.024 [-0.025, -0.023]           | 0.001 [-0.002, 0.005]     |
| Verbal    | Peak age         | 23.206 [21.996, 24.418]              | 39.202 [35.986, 42.428]           | -15.996 [-26.362, -3.858] |
|           | Peak score       | 0.067 [0.033, 0.101]                 | 0.116 [0.074, 0.157]              | -0.049 [-0.145, -0.002]   |
|           | Increasing slope | 0.042 [0.032, 0.052]                 | 0.014 [0.007, 0.027] <sup>a</sup> | 0.028 [0.012, 0.176]      |
|           | Decreasing slope | -0.006 [-0.008, -0.004]              | -0.013 [-0.017, -0.009]           | 0.007 [-0.001, 0.019]     |
| Reasoning | Peak age         | 12                                   | 23.512 [22.248, 24.777]           | -11.512 [-16.956, -4.221] |
|           | Peak score       | 0.208 [0.168, 0.249]                 | 0.196 [0.163, 0.228]              | 0.012 [-0.136, 0.046]     |
|           | Increasing slope | –                                    | 0.003 [-0.004, 0.009]             | –                         |
|           | Decreasing slope | -0.019 [-0.021, -0.018] <sup>a</sup> | -0.027 [-0.029, -0.026]           | 0.008 [0.004, 0.012]      |

290 Note: Values are missing for women's reasoning increasing slope as both segments were negative

291 <sup>a</sup> Combined slope across two segments is reported. Slopes of the individual segments are reported in-text.



292

## 293 **Verbal abilities**

294 Results of segmented regression of verbal scores are also summarized in Table 2. A model with  
295 one breakpoint was again found to best estimate women's verbal scores. The peak in women's verbal  
296 scores occurred at age 23.21 [95% CI = 22.00, 24.42] with a score of 0.07 [95% CI = 0.03, 0.10], as can  
297 be seen in Fig 2B. Slope of the increasing segment was 0.04 [95% CI = 0.03, 0.05], and slope of the  
298 decreasing segment was -0.006 [95% CI = -0.008, -0.004], showing a significant relationship between  
299 age and verbal abilities. Davies' test for a change in slope was significant ( $p < .001$ ), indicating that the  
300 linear relationship changed at the breakpoint.

301 Men's verbal scores were best estimated by a segmented model with two breakpoints. As can  
302 be seen in Fig 2B, men first had a breakpoint at age 18.85, at which point the rate at which scores  
303 were increasing, slowed. The peak in men's verbal score occurred at age 39.20 [95% CI = 35.99,  
304 42.42], with a score of 0.12 [95% CI = 0.07, 0.16]. Slope of the initial increasing segment was 0.10  
305 [95% CI = 0.07, 0.12], the slope of the second increasing segment was 0.005 [95% CI = 0.002, 0.007]  
306 and slope of the decreasing segment was -0.01 [95% CI = -0.02, -0.009], indicating a significant  
307 relationship between age and verbal abilities in all three sections. The change in slope was significant,  
308 as measured by the Davies' test ( $p < .001$ ).

309 As summarized in Table 3, men reached a peak in verbal abilities at a significantly later age  
310 than women. Men also had significantly higher scores at peak age, with a difference of 0.05 standard  
311 deviations. When comparing how scores increased up to peak age, women's scores improved at a  
312 faster rate than men's, however there was no difference when comparing the rate of decline from  
313 peak age to age 69.

## 314 Reasoning

315 A model with one breakpoint was again found to best estimate women's reasoning scores.  
316 However, this breakpoint occurred at age 38.24 years, and indicated a transition from a gradual to  
317 steeper decline: scores declined with a slope of -0.014 [95% CI = -0.017, -0.011] from age 12 to age  
318 38.24, at which point the negative slope increased to -0.029 [95% CI = -0.034, -0.023]. Davies' test for  
319 a change in slope was significant ( $p < .001$ ), indicating that the linear relationship changed. As can be  
320 seen in Fig 2C, the highest predicted scores for women occurred at age 12 with a score of 0.21 [95% CI  
321 = 0.12, 0.25]. However, because this is the cut-off age of our sample, it is not possible to determine  
322 whether this is indeed a true peak, or if scores are higher at earlier ages.

323 Men's reasoning scores were best estimated by a segmented model with one breakpoint. The  
324 breakpoint in men's reasoning score occurred at age 23.51 (95% CI = 22.25, 24.78), with a score of  
325 0.20 [95% CI = 0.16, 0.23]. The change in slope was significant, as measured by the Davies' test ( $p <$   
326  $.001$ ), however the slope of the initial segment was 0.002 [95% CI = -0.004, 0.010], and slope of the  
327 decreasing segment was -0.027 [95% CI = -0.029, -0.026], indicating that only the second segment  
328 showed a significant effect of age. Similar to women, this suggests that we did not capture a  
329 developmental increase in reasoning abilities within the current sample, and it is possible that the  
330 true peak occurs earlier than age 12.

331 Because we do not have a reliable measure of peak age in either gender, we compared  
332 between genders the age at which reasoning scores began to decline. In this sample, women began to  
333 decline in reasoning abilities significantly earlier than men, however reasoning scores at that age did  
334 not differ between genders (Table 3). Because women did not show an increase in reasoning scores

335 within our age range, we could not compare men and women on this measure. However, when  
336 comparing how scores declined after peak age, men declined significantly faster than women.

### 337 **Cognitive domain scores – matched samples**

338 In the matched samples, the general pattern of results was similar to the unmatched samples  
339 in both STM and reasoning. However, the previously found gender differences in verbal abilities  
340 disappeared in the matched sample. Segmented regression lines for the matched sample are shown  
341 in Fig 3.

342

343 **Fig 3. Regression lines for STM, Verbal, and Reasoning scores across the lifespan, ranging from 12 to**  
344 **69 years of age, in a socio-demographically matched sample.** 95% simultaneous confidence bands  
345 are shown in translucent colour around the line, and 95% confidence intervals for peak age are shown  
346 in translucent rectangles.

### 347 **Short-term memory**

348 Results of the segmented regression for STM scores of both genders in the socio-  
349 demographically matched sample are reported in Table 4. Both women and men again showed a  
350 significant change in slope as measured by the Davies' test ( $p < .001$  for both genders). As can be seen  
351 in Table 5, after matching women and men on sociodemographic variables, no significant differences  
352 were found in the age at which women and men peaked in STM, nor in the slopes of the increase and  
353 decrease in scores surrounding peak age. However, men still reached a higher overall score than  
354 women at their peak ages by a standard deviation of 0.21.

355 **Table 4: Segmented regression parameter estimates for age, from regression models estimated for**  
356 **each composite score in a demographically matched sample**

| Score | Gender | Coef | SE | <i>t</i> | <i>p</i> |
|-------|--------|------|----|----------|----------|
|-------|--------|------|----|----------|----------|

|           |       |       |       |       |        |
|-----------|-------|-------|-------|-------|--------|
| STM       | Women | 0.04  | 0.01  | 4.10  | < .001 |
|           | ΔAge  | -0.06 |       |       |        |
|           | Men   | 0.05  | 0.01  | 3.61  | < .001 |
|           | ΔAge  | -0.07 |       |       |        |
| Verbal    | Women | 0.05  | 0.01  | 7.58  | < .001 |
|           | ΔAge1 | -0.13 |       |       |        |
|           | ΔAge2 | -0.03 |       |       |        |
|           | Men   | 0.14  | 0.03  | 5.36  | < .001 |
|           | ΔAge1 | -0.13 |       |       |        |
|           | ΔAge2 | -0.02 |       |       |        |
| Reasoning | Women | -0.01 | 0.001 | -8.83 | < .001 |
|           | ΔAge  | -0.02 |       |       |        |
|           | Men   | 0.01  | 0.01  | 1.10  | .272   |
|           | ΔAge  | -0.04 |       |       |        |

357

358

359

360

361

362 **Table 5: Comparisons between genders matched on socio-demographic variables**

| Score     | Measure    | Women [95% CI]                       | Men [95% CI]                      | Difference [95% CI]      |
|-----------|------------|--------------------------------------|-----------------------------------|--------------------------|
| STM       | Peak age   | 20.423 [19.365, 21.482]              | 19.651 [18.609, 20.693]           | 0.772 [-2.089, 4.319]    |
|           | Peak score | 0.046 [-0.009, 0.101]                | 0.259 [0.187, 0.330]              | -0.213 [-2.63, -0.159]   |
|           | Increase   | 0.036 [0.019, 0.053]                 | 0.049 [0.022, 0.075]              | -0.013 [-0.132, 0.028]   |
|           | Decrease   | -0.023 [-0.025, -0.022]              | -0.025 [-0.027, -0.023]           | 0.002 [-0.001, 0.005]    |
| Verbal    | Peak age   | 24.889 [22.263, 27.515]              | 28.423 [25.330, 31.517]           | -3.534 [-20.490, 6.098]  |
|           | Peak score | 0.071 [0.033, 0.108]                 | 0.104 [0.050, 0.158]              | -0.033 [-0.091, 0.019]   |
|           | Increase   | 0.035 [0.016, 0.048] <sup>a</sup>    | 0.022 [0.006, 0.045] <sup>a</sup> | 0.013 [-0.012, 0.036]    |
|           | Decrease   | -0.006 [-0.008, -0.003]              | -0.008 [-0.011, -0.005]           | 0.002 [-0.003, 0.014]    |
| Reasoning | Peak age   | 12                                   | 19.623 [17.804, 21.542]           | -7.623 [-12.816, -2.226] |
|           | Peak score | 0.223 [0.187, 0.271]                 | 0.131 [0.060, 0.201]              | 0.092 [-0.047, 0.151]    |
|           | Increase   | –                                    | 0.015 [-0.012, 0.041]             | –                        |
|           | Decrease   | -0.020 [-0.021, -0.018] <sup>a</sup> | -0.025 [-0.027, -0.023]           | 0.005 [0.003, 0.008]     |

363 <sup>a</sup> Combined slope across two segments is reported.

364

## 365 **Verbal abilities**

366 Both women and men again showed a significant change in slope as measured by the Davies'  
367 test ( $p < .001$  in all tests). There were no significant differences in the age at which women and men  
368 peaked in verbal abilities, scores at peak age, nor in the slopes of the increase and decrease in scores  
369 surrounding peak age (Table 5).

## 370 **Reasoning**

371 Reasoning scores in our sample of women began to decrease at a significantly earlier age than  
372 men, however scores at that age did not differ between genders. While we did not capture an  
373 increase in reasoning abilities in either gender in our sample, reasoning scores decreased significantly  
374 faster in men than women (Table 5).

## 375 **Discussion**

376 After creating three cognitive domain scores from the 12 CBS tests based on their underlying  
377 factor structure, we were able to replicate previous findings suggesting that not all cognitive domains  
378 develop and decline in the same way. Specifically, STM increased rapidly from age 12 to the early 20s,  
379 at which point it decreased at a steady rate until age 69, the upper limit of our sample's age range.  
380 Verbal abilities also peaked in early adulthood, while reasoning did not show a clear peak in scores,  
381 instead being characterized by either a decline from age 12, or a plateau followed by a decline. These  
382 results were consistent with previous studies showing that cognition is not a unitary concept, and  
383 different cognitive abilities have separable developmental trajectories [11,12]. However, they extend  
384 the results of those studies in several important ways:

385 First, when examining the progression of STM, verbal abilities, and reasoning in men and  
386 women separately, all three cognitive domains also showed unique gender differences. Although men  
387 and women peaked in STM performance at the same age, men reached a slightly higher score than  
388 women. In verbal abilities, women reached their peak faster and earlier, but men again reached  
389 higher scores. While women's reasoning began to decline earlier than men's, men declined at a faster  
390 rate. These results extend what is known from previous gender research. For example, there is  
391 evidence that men lose grey matter volume more rapidly with age than women, especially in fronto-  
392 temporal regions [47]; this in turn may lead to a faster rate of decline in cognitive function, fitting the  
393 pattern we see here in the reasoning domain. In contrast, women are thought to have better verbal  
394 processing than men; however we see the opposite here, with men reaching a higher peak score than  
395 women. One possible explanation for this discrepancy could be the age at which verbal abilities are  
396 tested. For example, Burton and colleagues (19) tested a sample of university students, which is  
397 common in Psychology research. Looking at the pattern of verbal abilities in men and women in the  
398 current unmatched sample, women seem to outperform men at age 23, which, if we were to only  
399 examine individuals around this age, may lead to the erroneous conclusion that women have superior  
400 verbal abilities. Similarly, men are frequently reported to be better at mental rotation than women  
401 [19], a test included in our reasoning domain. In our sample, we found that peak reasoning scores did  
402 not differ between genders, but women declined much earlier than men. Again, comparing genders  
403 within a limited age range would have led to the erroneous conclusion that men outperform women  
404 in this domain, when in reality it is a difference in trajectory of reasoning abilities. The present results  
405 underline the need to take the progression of cognitive abilities across the lifespan into account when  
406 studying gender differences.

407           While these results are presumed to be reflective of the cognitive performance of the  
408 population, they are complicated by the differences in socio-demographic factors. Several of the  
409 factors showing the largest differences, such as sleep and anxiety, have known effects on cognitive  
410 function [38], making it difficult to determine what is driving the observed gender differences. Further  
411 complicating the matter is that because these socio-demographic factors are gender-dependent, it is  
412 not possible to include them in the model due to issues with multicollinearity. By matching men and  
413 women on these factors, however, we were able to limit their effect on the data as much as possible  
414 and the results show that this greatly reduced the differences in cognitive performance and aging. Of  
415 course, there are numerous demographic factors that we did not control for, and it is impossible to  
416 truly capture all of them. Additionally, there are some socio-demographic differences that may have  
417 biological underpinnings. For example, depression is more prevalent in women, and this may be in  
418 part due to the presence of sex-specific forms such as premenstrual dysphoric disorder [48]. It is  
419 therefore difficult to disentangle the environment from biological sex differences, however  
420 accounting for these differences, regardless of their origin, is necessary for describing gender  
421 differences in cognition alone.

422           As noted above, controlling for gender-specific differences in socio-demographic factors  
423 greatly reduced the differences in cognitive performance and aging. While men still reached a higher  
424 peak score than women, the difference between peak scores decreased from .28 SDs to .21 SDs.  
425 Notably, all differences in verbal abilities disappeared, with women appearing more like men in the  
426 nature of their progress, having no differences in peak age, score, or the rate of improvement or  
427 decline. However, although the gender gap was smaller (or absent) in the matched sample, this does  
428 not mean that differences in the unmatched sample should be ignored. While they may not

429 necessarily be inherent to biology, environmental influences are a part of life, and they do drive  
430 gender differences in cognitive abilities. Thus, it is reasonable to conclude that gender differences in  
431 cognitive abilities, based on biological sex alone, are minimal; however, there are notable effects of  
432 environmental factors that in turn drive gender differences in cognition.

433         One large area of disparity that remained even when controlling for environmental factors was  
434 with respect to the age at which reasoning abilities began to decline. Women declined significantly  
435 earlier than men, even when controlling for demographic factors. We were also not able to capture a  
436 reliable measure of the age at which reasoning abilities peak in either gender. In women, in both the  
437 full and matched samples, scores declined from 12 years of age, onward. This could be because 12 is  
438 the age at which women's reasoning abilities do indeed peak. However, it is also possible that women  
439 peak earlier, but due to lack of data we were unable to determine the true peak from the current  
440 sample. Similarly, both unmatched and matched samples of men showed a plateau in reasoning  
441 scores, rather than an increase, until the point at which they began to decline. There are several  
442 possible explanations here. First, it is possible that men do peak in early adulthood, somewhere  
443 between 18 and 24 years of age, but the increase in reasoning abilities was not captured due to too  
444 small a sample size or noisy data. Second, they could follow a similar trajectory to women, with a slow  
445 decline before a steeper one, again not captured due to a lack of data. Because our sample of men  
446 was very large (over 32,000 in the unmatched sample), it is unlikely that either of these options are  
447 the case. Third, this plateau could be a true peak in reasoning, lasting several years, before beginning  
448 to decline. Previous research does suggest that reasoning abilities are relatively mature by age 12  
449 [6,9], and another large-scale study has shown that by age 18, reasoning abilities have begun to  
450 decline [12]. Thus, although it is not possible to confirm that decline begins around age 12 in the



451 current sample of women, the data follow a pattern that fits previous research and supports this  
452 claim.

453 The results presented here offer some insight into how to tailor interventions for cognitive  
454 decline appropriately for each gender. For example, women are known to experience more anxiety  
455 than men [32], a fact reflected in the current sample. Anxiety is known to correlate negatively with  
456 working memory [49]. Thus, to improve working memory, or protect against its decline, therapies  
457 should perhaps focus on reducing anxiety in everyone, with a targeted focus on women. Another  
458 example is substance abuse, which is more prevalent in men [34]. Because substance abuse  
459 negatively affects cognition [30], especially with respect to aging [50], a focused campaign aimed to  
460 reduce drug and alcohol consumption in men may yield a slowing in cognitive decline at the male  
461 population level. These gender-focused interventions can be combined with other treatments known  
462 to provide protection from cognitive decline, such as frequent exercise [51] for a well-rounded  
463 defence against cognitive aging.

## 464 **Conclusions**

465 By examining a sample of over 45,000 individuals, ranging from 12 to 69 years of age, we  
466 showed how different cognitive abilities vary across the lifespan. Each domain had a unique  
467 relationship with age, demonstrating that not all cognitive processes follow the same pattern.  
468 Importantly, we found differences in the way women and men cognitively age, and showed that these  
469 disparities are reduced when controlling for socio-demographics such as sleep and anxiety.  
470 Nevertheless, some gender differences remained, supporting the notion that gender differences in  
471 cognition are likely guided by a complex interplay of both biology and environment.

472

## 473 **References**

- 474 1. United Nations Department of Economic and Social Affairs. World Population Prospects 2019:  
475 Highlights. 2019.
- 476 2. Anderson P, Anderson V, Northam E, Taylor HG. Standardization of the Contingency Naming  
477 Test (CNT) for school-age children: a measure of reactive flexibility. *Clin Neuropsychol Assess.*  
478 2000;1: 247–273. Available:  
479 [http://scholar.google.com/scholar?hl=en&btnG=Search&q=intitle:Standardization+of+the+Con](http://scholar.google.com/scholar?hl=en&btnG=Search&q=intitle:Standardization+of+the+Contingency+NamingTest+(CNT)+for+school+aged+children:+A+measure+of+reactive+flexibility#0)  
480 [tingency+NamingTest+\(CNT\)+for+school+aged+children:+A+measure+of+reactive+flexibility#0](http://scholar.google.com/scholar?hl=en&btnG=Search&q=intitle:Standardization+of+the+Contingency+NamingTest+(CNT)+for+school+aged+children:+A+measure+of+reactive+flexibility#0)
- 481 3. Karapetsas AB, Vlachos FM. Sex and Handedness in Development of Visuomotor Skills. *Percept*  
482 *Mot Skills.* 1997;85: 131–140. doi:10.2466/pms.85.5.131-140
- 483 4. Krikorian R, Bartok JA. Developmental Data for the Porteus Maze Test. *Clin Neuropsychol.*  
484 1998;12: 305–310. doi:10.1076/clin.12.3.305.1984
- 485 5. Feng J, Spence I, Pratt J. Playing an Action Video Game in Reduces Gender Differences Spatial  
486 Cognition. *Psychol Sci.* 2007;18: 850–855.
- 487 6. Anderson P. Assessment and Development of Executive Function (EF) During Childhood. *Child*  
488 *Neuropsychol.* 2002;8: 71–82. doi:10.1076/chin.8.2.71.8724
- 489 7. Rizeq J, Flora DB, Toplak ME. Changing relations among cognitive abilities across development:  
490 implications for measurement and research. *Clin Neuropsychol.* 2017;31: 1353–1374.  
491 doi:10.1080/13854046.2017.1317034
- 492 8. Diamond A. Executive Function. *Annu Rev Psychol.* 2013;64: 135–168. doi:10.1016/B978-0-12-  
493 385157-4.01147-7
- 494 9. Anderson V, Anderson P, Northam E, Jacobs R, Catroppa C. Developmental Neuropsychology

- 495 Differential Development of Attention and Executive Functions in 3- to 12-Year-Old Finnish  
496 Children. *Dev Neuropsychol.* 2001;20: 385–406. doi:10.1207/S15326942DN2001
- 497 10. Lee K, Bull R, Ho R. Developmental Changes in Executive Functioning. *Child Dev.* 2013;84: 1933–  
498 1953. doi:10.1111/cdev.12096
- 499 11. Hartshorne JK, Germine LT. When Does Cognitive Functioning Peak? The Asynchronous Rise  
500 and Fall of Different Cognitive Abilities Across the Life Span. *Psychol Sci.* 2015;26: 433–443.  
501 doi:10.1177/0956797614567339
- 502 12. Salthouse TA. When does age-related cognitive decline begin? *Neurobiol Aging.* 2009;30: 507–  
503 514. doi:10.1016/j.neurobiolaging.2008.09.023
- 504 13. Vecchi T, Girelli L. Gender differences in visuo-spatial processing: The importance of  
505 distinguishing between passive storage and active manipulation. *Acta Psychol (Amst).* 1998;99:  
506 1–16. doi:10.1016/S0001-6918(97)00052-8
- 507 14. Tzuriel D, Egozi G. Gender Differences in Spatial Ability of Young Children : The Effects of  
508 Training and Processing Strategies. *Child Dev.* 2010;81: 1417–1430.
- 509 15. Krinzinger H, Wood G, Willmes K. What accounts for individual and gender differences in the  
510 multi-digit number processing of primary school children? *Zeitschrift fur Psychol / J Psychol.*  
511 2012;220: 78–89. doi:10.1027/2151-2604/a000099
- 512 16. Sokolowski HM, Hawes Z, Lyons IM. What explains sex differences in math anxiety? A closer  
513 look at the role of spatial processing. *Cognition.* 2019;182: 193–212.  
514 doi:10.1016/j.cognition.2018.10.005
- 515 17. Scheuringer A, Wittig R, Pletzer B. Sex differences in verbal fluency: the role of strategies and  
516 instructions. *Cogn Process.* 2017;18: 407–417. doi:10.1007/s10339-017-0801-1

- 517 18. Scheuringer A, Pletzer B. Sex differences and menstrual cycle dependent changes in cognitive  
518 strategies during spatial navigation and verbal fluency. *Front Psychol.* 2017;8: 1–12.  
519 doi:10.3389/fpsyg.2017.00381
- 520 19. Burton LA, Henninger D, Hafetz J. Gender differences in relations of mental rotation, verbal  
521 fluency, and SAT scores to finger length ratios as hormonal indexes. *Dev Neuropsychol.*  
522 2005;28: 493–505. doi:10.1207/s15326942dn2801\_3
- 523 20. Griksiene R, Ruksenas O. Effects of hormonal contraceptives on mental rotation and verbal  
524 fluency. *Psychoneuroendocrinology.* 2011;36: 1239–1248. doi:10.1016/j.psyneuen.2011.03.001
- 525 21. Wu Y, Zhang D, Pang Z, Oksuzyan A, Jiang W, Wang S, et al. Gender-specific patterns in age-  
526 related decline in general health among Danish and Chinese: A cross-national comparative  
527 study. *Geriatr Gerontol Int.* 2012;12: 431–439. doi:10.1111/j.1447-0594.2011.00784.x
- 528 22. Cornelis MC, Wang Y, Holland T, Agarwal P, Weintraub S, Morris MC. Age and cognitive decline  
529 in the UK Biobank. *PLoS One.* 2019;14: 1–16. doi:10.1371/journal.pone.0213948
- 530 23. Lipnicki DM, Crawford JD, Dutta R, Thalamuthu A, Kochan NA, Andrews G, et al. Age-related  
531 cognitive decline and associations with sex, education and apolipoprotein E genotype across  
532 ethnocultural groups and geographic regions: a collaborative cohort study. *PLoS Med.* 2017;14.
- 533 24. Laing KR, Mitchell D, Wersching H, Czira ME, Berger K, Baune BT. Brain-derived neurotrophic  
534 factor (BDNF) gene: A gender-specific role in cognitive function during normal cognitive aging  
535 of the MEMO-Study? *Age (Omaha).* 2012;34: 1011–1022. doi:10.1007/s11357-011-9275-8
- 536 25. Malpetti M, Ballarini T, Presotto L, Garibotto V, Tettamanti M, Perani D. Gender differences in  
537 healthy aging and Alzheimer’s Dementia: A 18F-FDG-PET study of brain and cognitive reserve.  
538 *Hum Brain Mapp.* 2017;38: 4212–4227. doi:10.1002/hbm.23659

- 539 26. Miller DI, Halpern DF. The new science of cognitive sex differences. *Trends Cogn Sci.* 2014;18:  
540 37–45. doi:10.1016/j.tics.2013.10.011
- 541 27. Blums A, Belsky J, Grimm K, Chen Z. Building Links Between Early Socioeconomic Status,  
542 Cognitive Ability, and Math and Science Achievement. *J Cogn Dev.* 2017;18: 16–40.  
543 doi:10.1080/15248372.2016.1228652
- 544 28. Lubinski D. Cognitive epidemiology: With emphasis on untangling cognitive ability and  
545 socioeconomic status. *Intelligence.* 2009;37: 625–633. doi:10.1016/j.intell.2009.09.001
- 546 29. Zaremba D, Schulze Kalthoff I, Förster K, Redlich R, Grotegerd D, Leehr EJ, et al. The effects of  
547 processing speed on memory impairment in patients with major depressive disorder. *Prog*  
548 *Neuro-Psychopharmacology Biol Psychiatry.* 2019;92: 494–500.  
549 doi:10.1016/j.pnpbp.2019.02.015
- 550 30. Crego A, Holguín SR, Parada M, Mota N, Corral M, Cadaveira F. Binge drinking affects  
551 attentional and visual working memory processing in young university students. *Alcohol Clin*  
552 *Exp Res.* 2009;33: 1870–1879. doi:10.1111/j.1530-0277.2009.01025.x
- 553 31. Hampshire A, Highfield RR, Parkin BL, Owen AM. Fractionating Human Intelligence. *Neuron.*  
554 2012;76: 1225–1237. doi:10.1016/j.neuron.2012.06.022
- 555 32. McLean CP, Asnaani A, Litz BT, Hofmann SG. Gender differences in anxiety disorders:  
556 Prevalence, course of illness, comorbidity and burden of illness. *J Psychiatr Res.* 2011;45: 1027–  
557 1035. doi:10.1016/j.jpsychires.2011.03.006
- 558 33. Parker G, Brotchie H. Gender differences in depression. *Int Rev Psychiatry.* 2010;22: 429–436.  
559 doi:10.3109/09540261.2010.492391
- 560 34. Compton W, Thomas YF, Stinson FS, Grant BF. Prevalence, Correlates, Disability, and

- 561 Comorbidity of DSM-IV Drug Abuse and Dependence in the United States. *Arch Gen Psychiatry*.  
562 2007;64: 566–576. Available:  
563 [http://www.pubmedcentral.nih.gov/articlerender.fcgi?artid=2707116&tool=pmcentrez&rende](http://www.pubmedcentral.nih.gov/articlerender.fcgi?artid=2707116&tool=pmcentrez&rendertype=abstract)  
564 [rtype=abstract](http://www.pubmedcentral.nih.gov/articlerender.fcgi?artid=2707116&tool=pmcentrez&rendertype=abstract)
- 565 35. Grant BF, Chou SP, Saha TD, Pickering RP, Kerridge BT, Ruan WJ, et al. Prevalence of 12-month  
566 alcohol use, high-risk drinking, and DSM-IV alcohol use disorder in the United States, 2001-  
567 2002 to 2012-2013: Results from the National Epidemiologic Survey on Alcohol and Related  
568 Conditions. *JAMA Psychiatry*. 2017;74: 911–923. doi:10.1001/jamapsychiatry.2017.2161
- 569 36. Bratberg GH, Wilsnack SC, Wilsnack R, Håvås Haugland S, Krokstad S, Sund ER, et al. Gender  
570 differences and gender convergence in alcohol use over the past three decades (1984-2008),  
571 the HUNT Study, Norway. *BMC Public Health*. 2016;16: 1–12. doi:10.1186/s12889-016-3384-3
- 572 37. Wesnes KA, Brooker H, Ballard C, Mccambridge L, Stenton R, Corbett A. Utility, reliability,  
573 sensitivity and validity of an online test system designed to monitor changes in cognitive  
574 function in clinical trials. *Int J Geriatr Psychiatry*. 2017. doi:10.1002/gps.4659
- 575 38. Wild CJ, Nichols ES, Battista ME, Stojanoski B, Owen AM. Dissociable effect of self-reported  
576 daily sleep duration on high-level cognitive abilities. *Sleep*. 2018;in press: 1–11.  
577 doi:10.1093/sleep/zsy182
- 578 39. Owen AM, Hampshire A, Grahn JA, Stenton R, Dajani S, Burns AS, et al. Putting brain training to  
579 the test. *Nature*. 2010;465: 775–8. doi:10.1038/nature09042
- 580 40. Muggeo VMR. segmented: An R package to fit regression models with broken-line  
581 relationships. *R news*. 2008;8: 20–25. doi:<http://dx.doi.org/10.1192/bjp.195.1.A6>
- 582 41. Ho DE, Imai K, King G, Stuart EA. MatchIt : Nonparametric Preprocessing for. *J Stat Softw*.

- 583 2011;42: 1–28. Available: <http://www.jstatsoft.org/v42/i08>
- 584 42. Canty A, Ripley B. boot: Bootstrap R(S-Plus) Functions. R Packag version 13-20. 2019.
- 585 43. Wickham H. ggplot2: Elegant Graphics for Data Analysis. Springer-Verlag New York. 2016.
- 586 44. Muggeo VMR. Estimating regression models with unknown break-points. *Stat Med*. 2003;22:  
587 3055–71. doi:10.1002/sim.1545
- 588 45. Tiwari RC, Cronin KA, Davis W, Feuer EJ, Yu B, Chib S. Bayesian model selection for join point  
589 regression with application to age-adjusted cancer rates. *J R Stat Soc Ser C Appl Stat*. 2005;54:  
590 919–939. doi:10.1111/j.1467-9876.2005.00518.x
- 591 46. Davies RB. Hypothesis Testing when a Nuisance Parameter is Present Only Under the  
592 Alternatives Published by : Oxford University Press on behalf of Biometrika Trust Stable URL :  
593 <http://www.jstor.org/stable/2336019> Your use of the JSTOR archive indica. *Biometrika*.  
594 2002;89: 484–489.
- 595 47. Kryspin-Exner I, Lamplmayr E, Felnhofer A. Geropsychology: The gender gap in human aging-a  
596 mini-review. *Gerontology*. 2011;57: 539–548. doi:10.1159/000323154
- 597 48. Albert PR. Why is depression more prevalent in women? *J Psychiatry Neurosci*. 2015;40: 219–  
598 221. doi:10.1503/jpn.150205
- 599 49. Moran TP. Anxiety and Working Memory Capacity: A Meta-Analysis and Narrative Review.  
600 *Psychol Bull*. 2016;142. doi:10.1037/bul0000051.supp
- 601 50. Woods AJ, Porges EC, Bryant VE, Seider T, Gongvatana A, Kahler CW, et al. Current Heavy  
602 Alcohol Consumption is Associated with Greater Cognitive Impairment in Older Adults. *Alcohol*  
603 *Clin Exp Res*. 2016;40: 2435–2444. doi:10.1111/acer.13211
- 604 51. Erickson KI, Voss MW, Prakash RS, Basak C, Szabo A, Chaddock L, et al. Exercise training

605 increases size of hippocampus and improves memory. Proc Natl Acad Sci. 2011;108: 3017–  
606 3022. doi:10.1073/pnas.1015950108

607

## 608 **Supporting information**

609 **S1 Fig. Local regression curves for STM, Verbal, and Reasoning scores across the lifespan, ranging**  
610 **from 12 to 69 years of age.** 95% confidence bands are shown in translucent colour around the line.

611 **S2 Fig. Histograms of cognitive domain scores by gender, in a socio-demographically matched**  
612 **sample.** Dashed lines indicate mean.

613 **S3 Fig. Local regression curves for STM, Verbal, and Reasoning scores across the lifespan, ranging**  
614 **from 12 to 69 years of age, in a socio-demographically matched sample.** 95% simultaneous  
615 confidence bands are shown in translucent colour around the line.

616 **S1 Table. Comparison of demographic variables across women and men in a matched sample.**



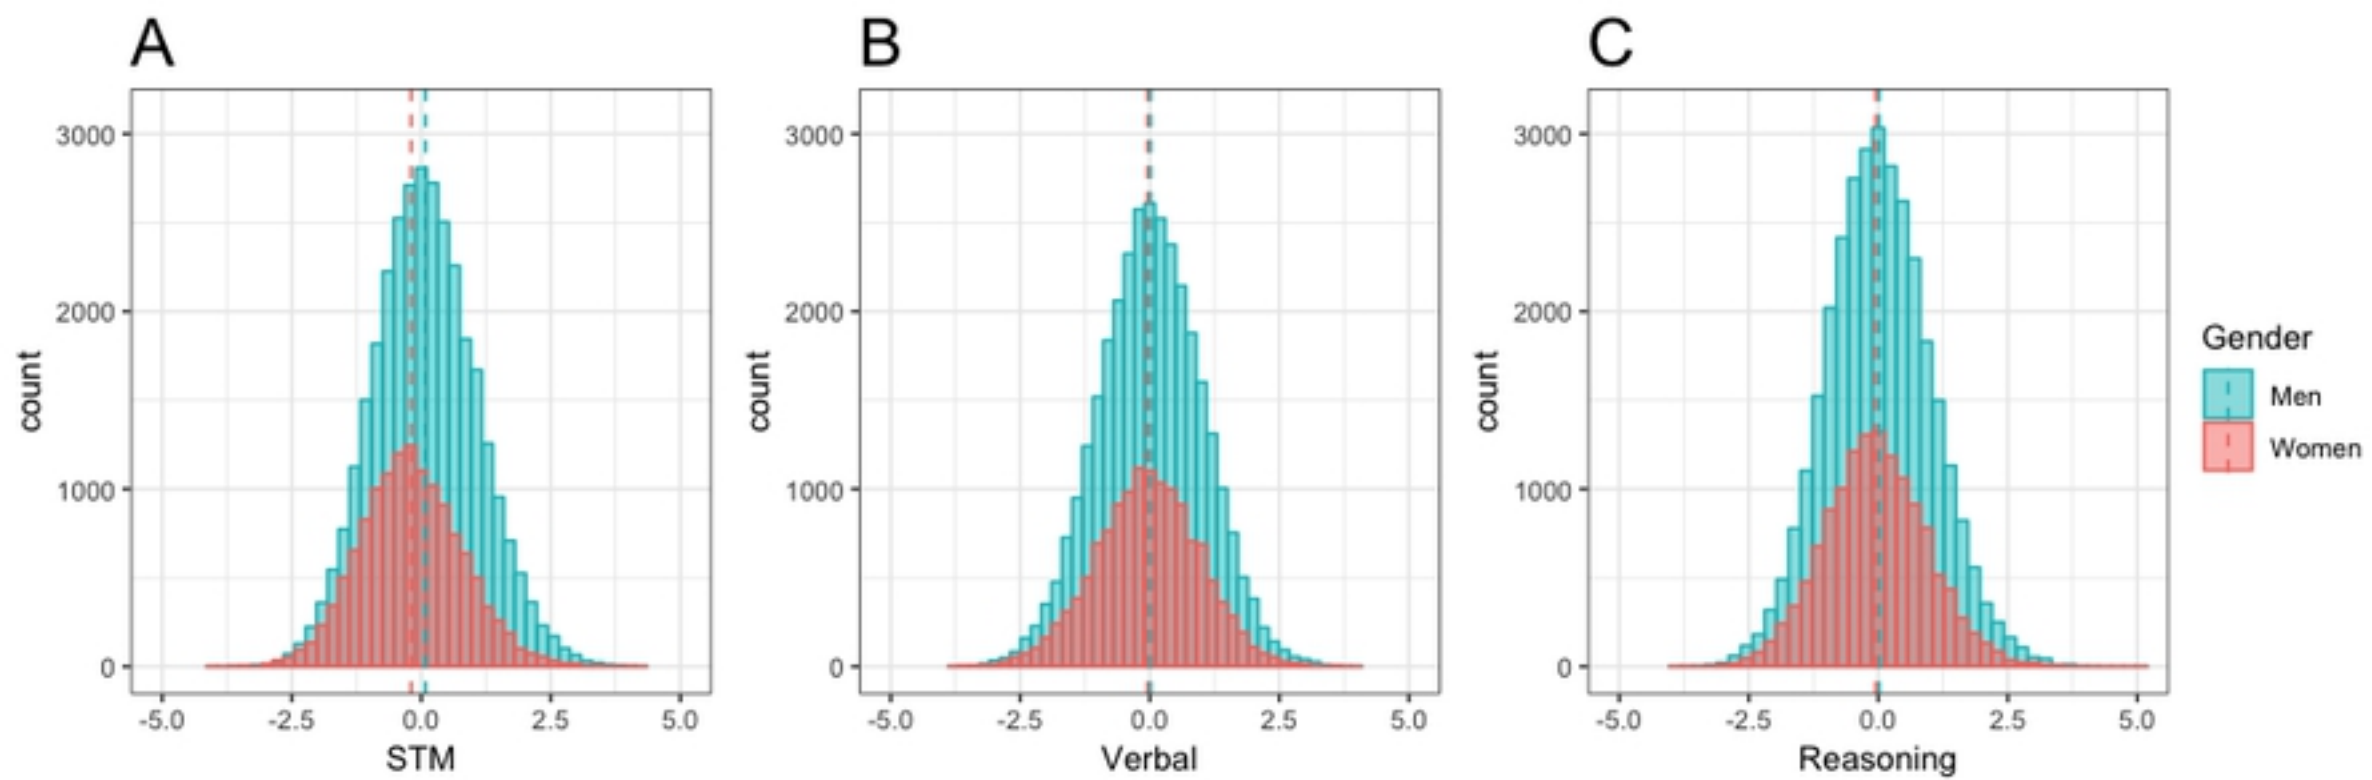

Figure

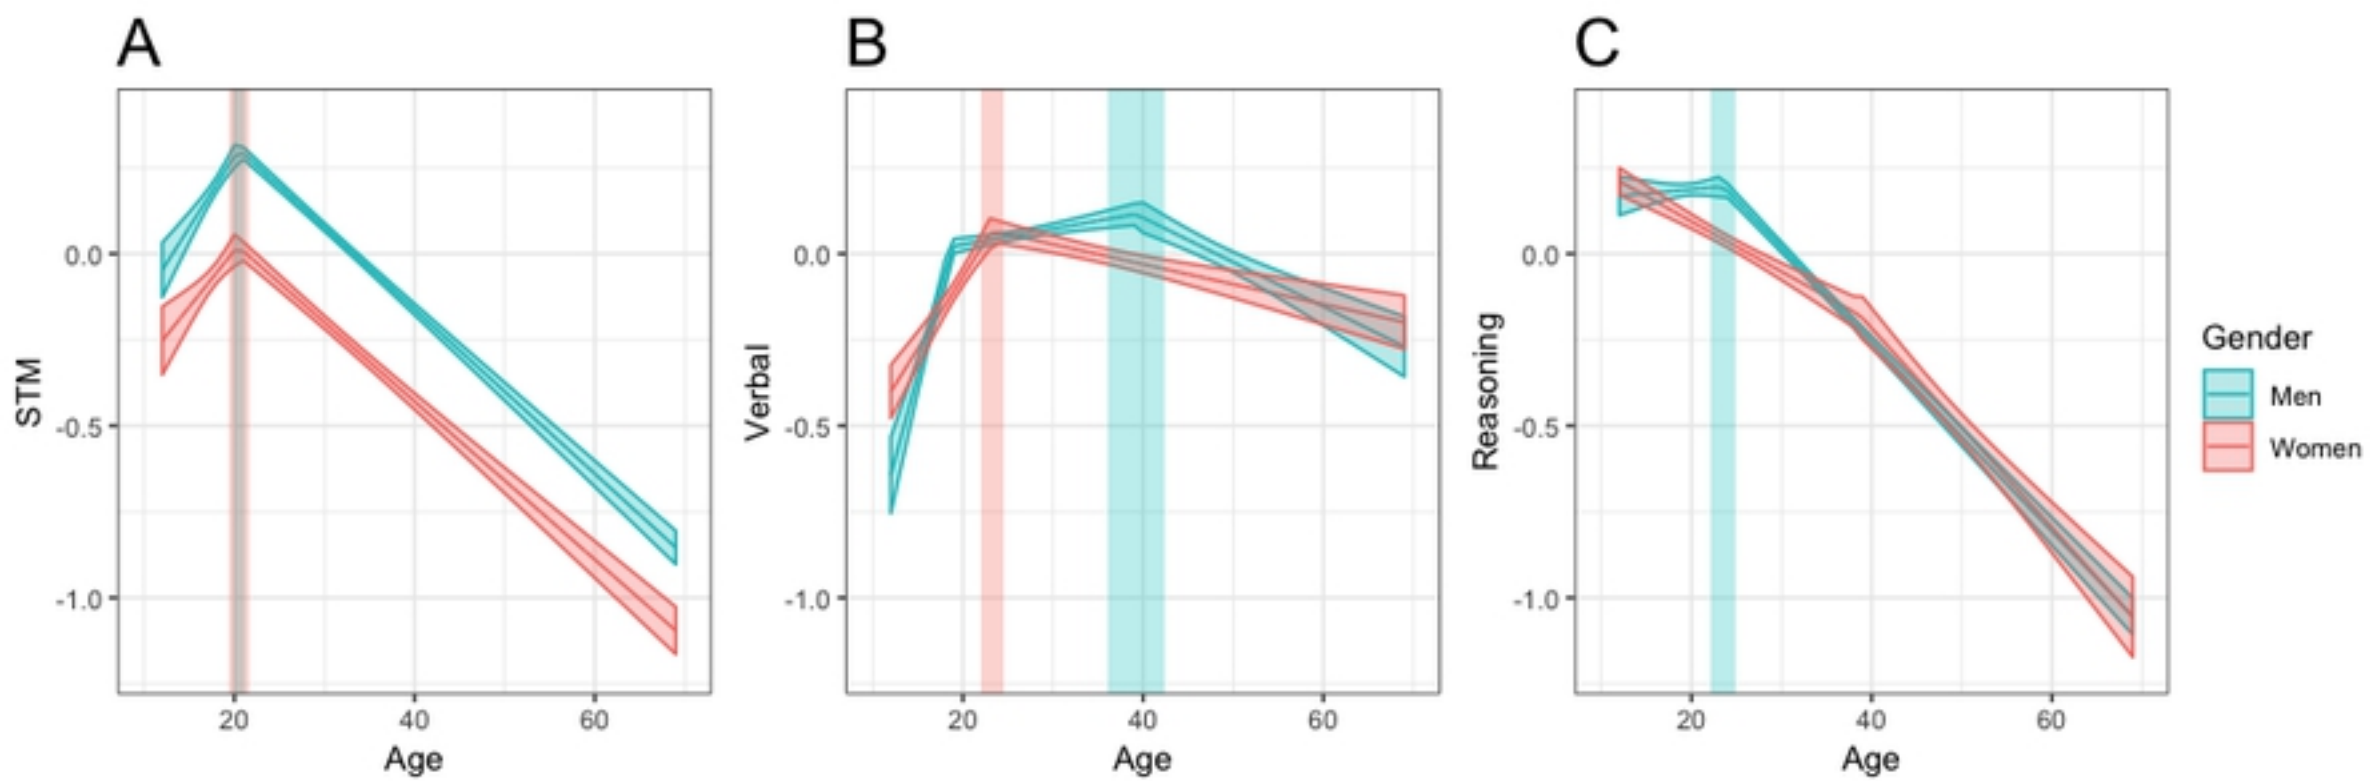

Figure

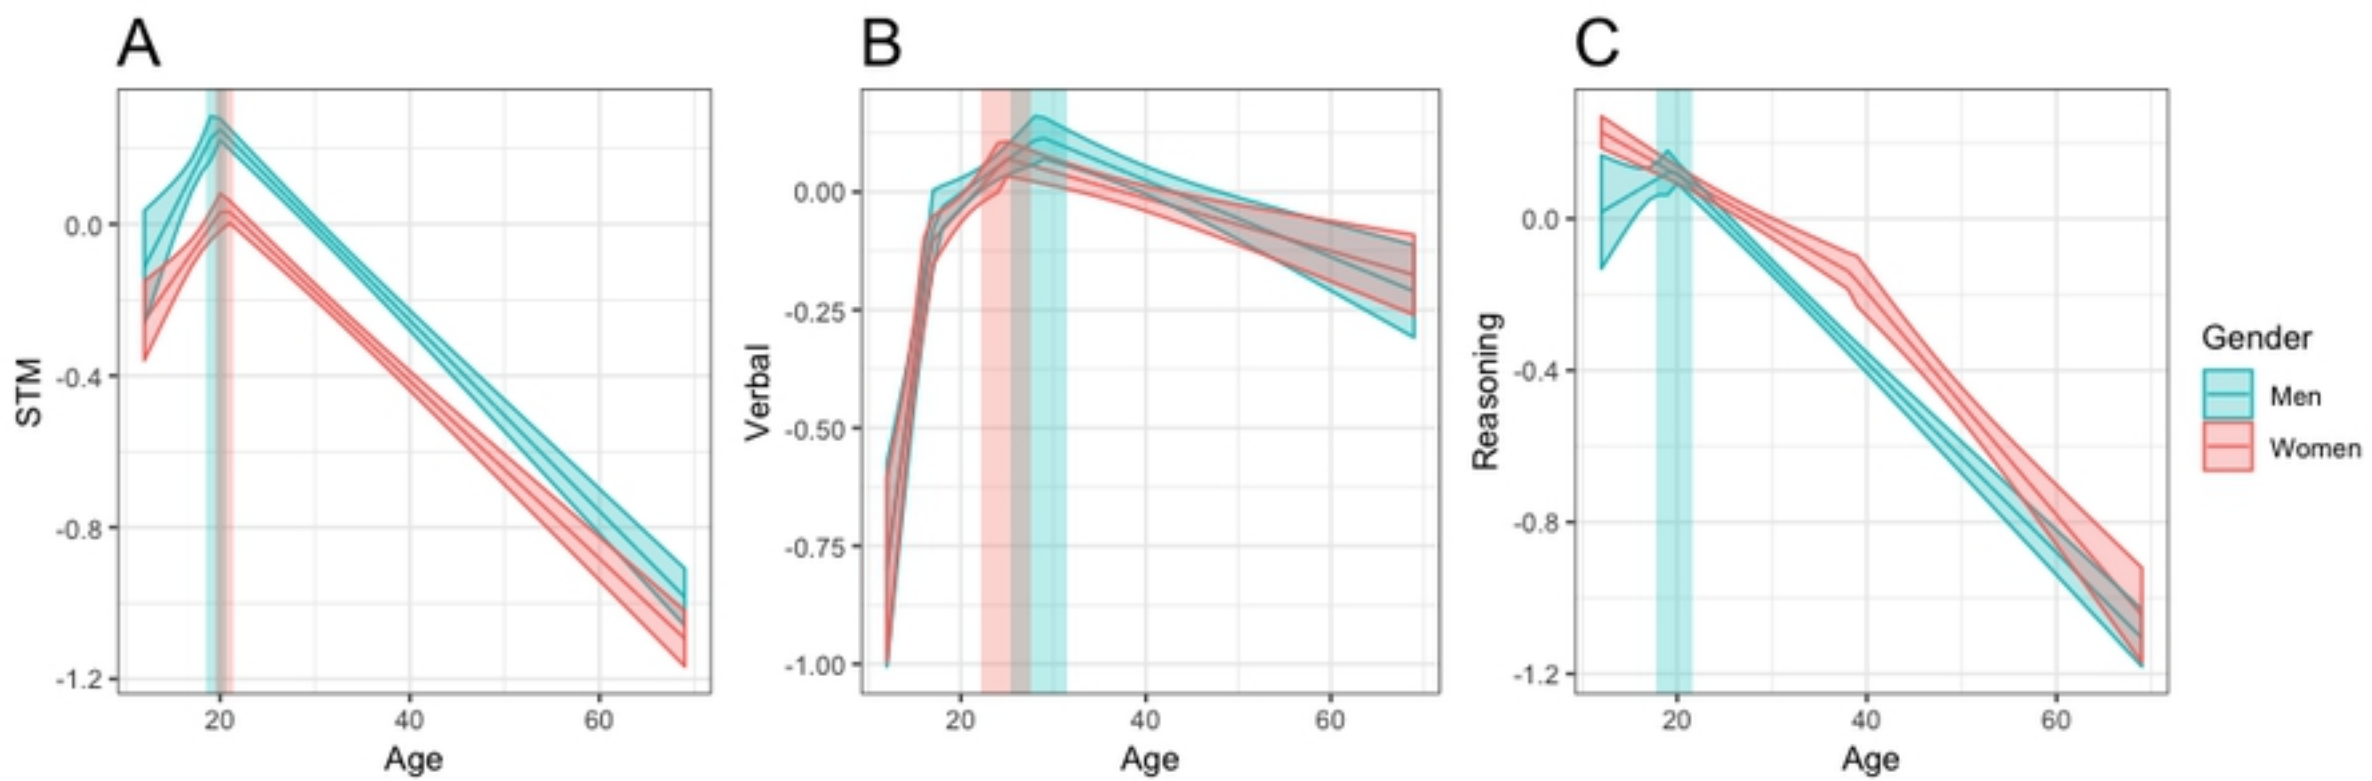

Figure

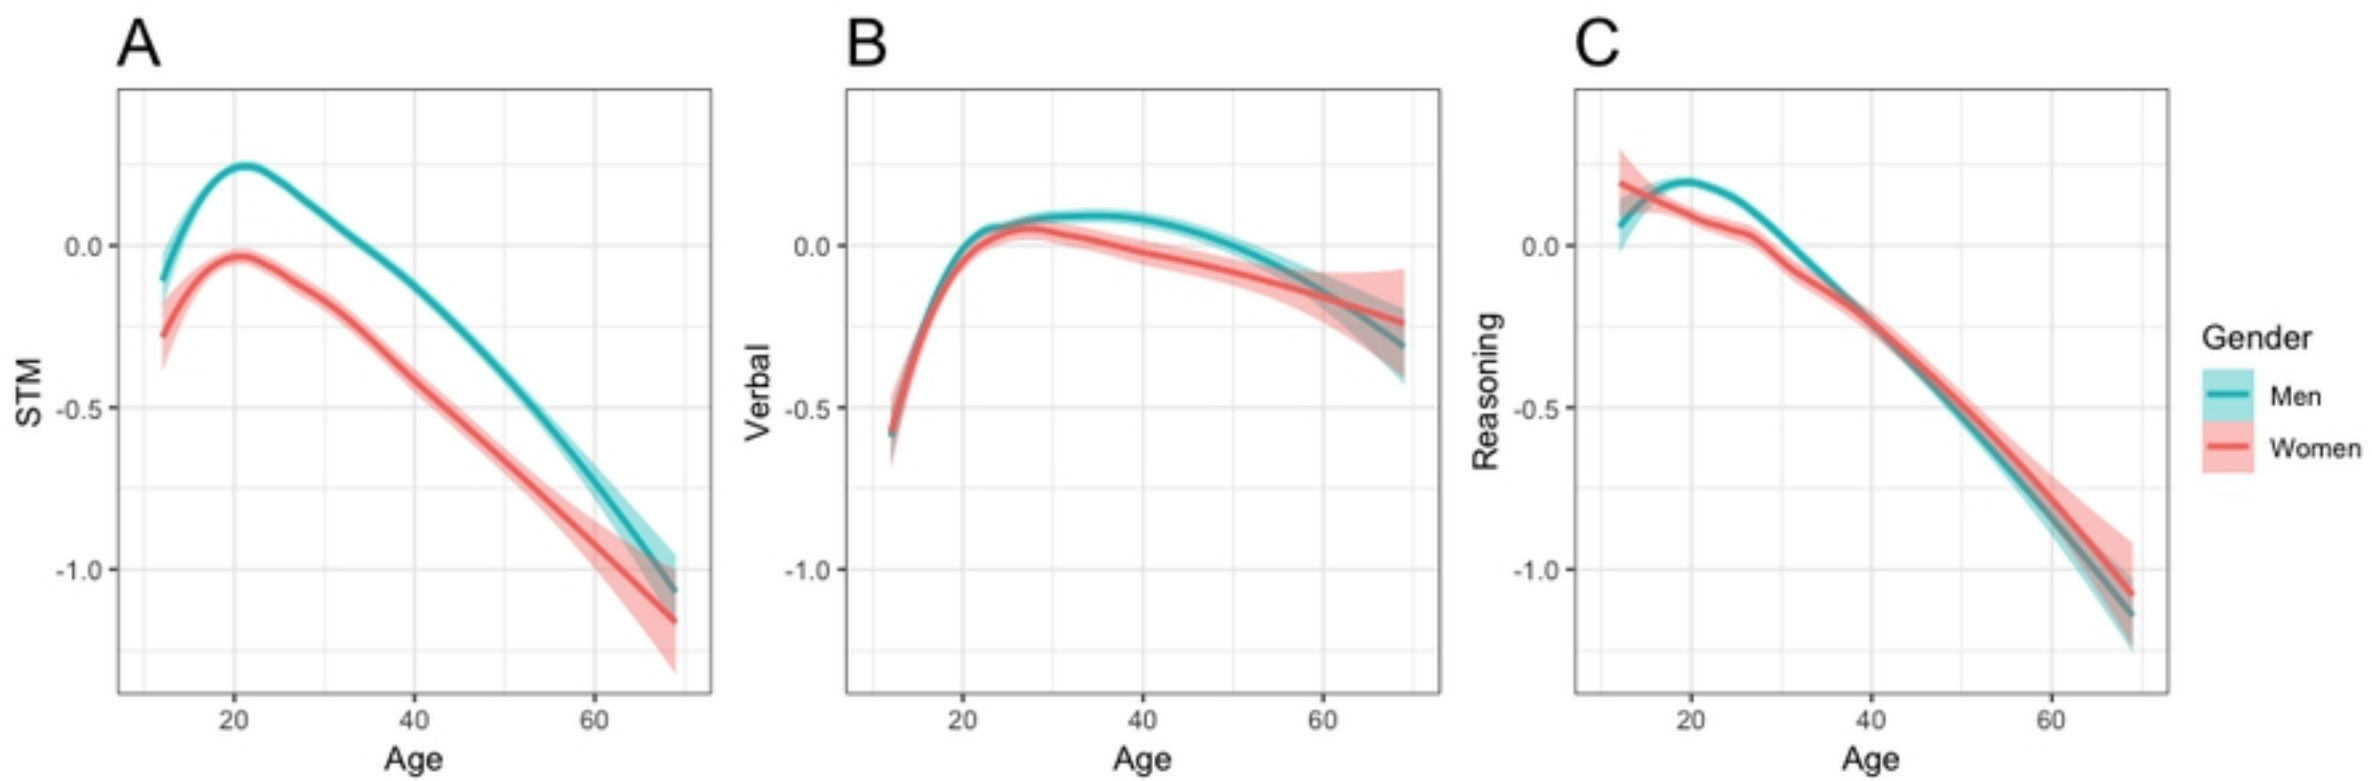

Figure

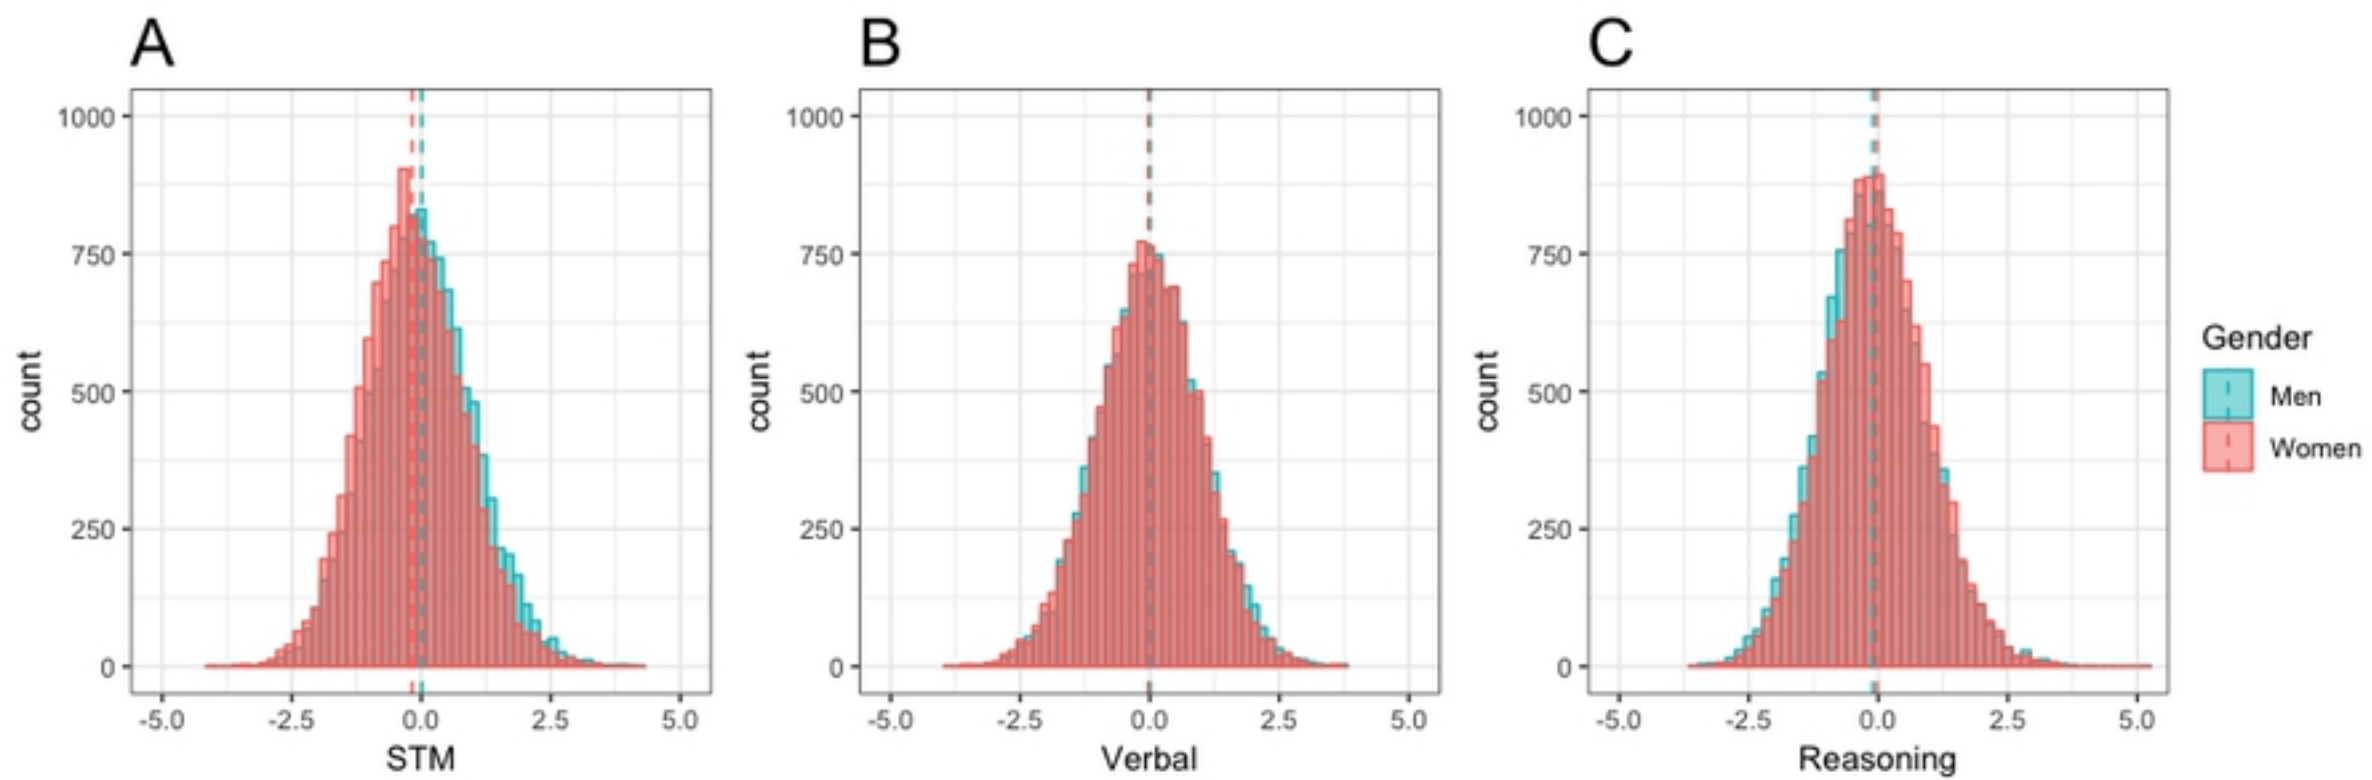

Figure

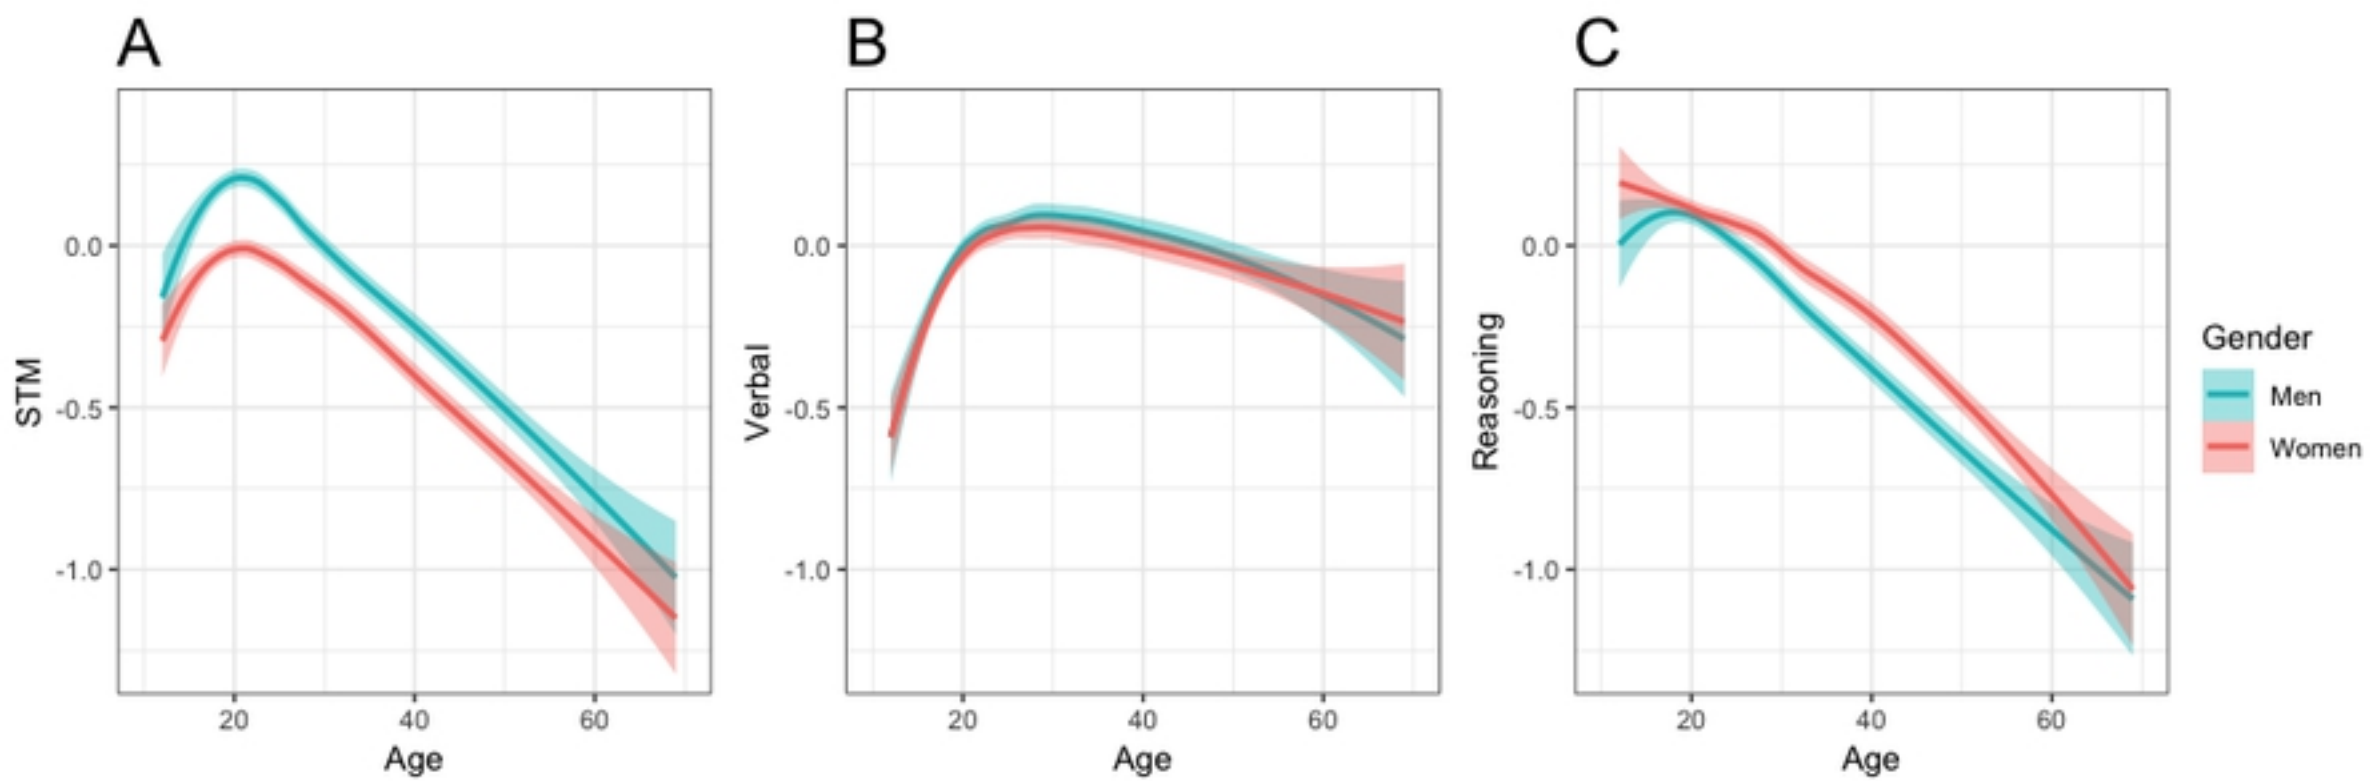

Figure
