1  
2  
3  
4  
5  
6  
7  
8  
9  
10  
11  
12  
13  
14  
15  
16  
17  
18  
19  
20  
21  
22  
23  
24

# Cognition across the lifespan: age, gender, and sociodemographic influences

Nichols, E. S.<sup>a,b\*</sup>, Wild, C. J.<sup>b</sup>, Owen, A. M.<sup>b,c,d</sup> & Soddu, A.<sup>b,e</sup>

<sup>a</sup>Faculty of Education, Western University, London, Ontario, Canada

<sup>b</sup>Brain and Mind Institute, Western University, London, Ontario, Canada

<sup>c</sup>The Department of Physiology and Pharmacology, Western University, London, Ontario, Canada

<sup>d</sup>The Department of Psychology, Western University, London, Ontario, Canada

<sup>e</sup>The Department of Physics and Astronomy, Western University, London, Ontario, Canada

\*Corresponding author information:

Emily S. Nichols

1137 Western Rd

London, Ontario, Canada

e-mail: [enicho4@uwo.ca](mailto:enicho4@uwo.ca)

Word count: 4,999

## 25 **Abstract**

26 Maintaining cognitive health across the lifespan has been the focus of a multi-billion-dollar  
27 industry. In order to guide treatment and interventions, a clear understanding of the way that  
28 proficiency in different cognitive domains develops and declines across the lifespan is  
29 necessary. Additionally, there are gender differences in a range of other factors, such as anxiety  
30 and substance use, that are also known to affect cognition, although the scale of this  
31 interaction is unknown. Our objective was to assess differences in cognitive function across the  
32 lifespan in men and women in a large, representative sample. Leveraging online cognitive  
33 testing, a sample of 18,902 men and women ranging in age from 12-69 matched on socio-  
34 demographic factors were studied. Segmented regression was used to model three cognitive  
35 domains – short-term memory, verbal abilities, and reasoning. Gender differences in all three  
36 domains were minimal; however, after broadening the sample in terms of socio-demographic  
37 factors, gender differences appeared. These results suggest that cognition across the lifespan  
38 differs for men and women, but is greatly influenced by environmental factors. We discuss  
39 these findings within a framework that describes gender differences in cognition as likely  
40 guided by a complex interplay between biology and environment.

41

42 **Keywords:** Cognition, Aging, Gender, Cognitive Decline, Statistical Modeling

43

44

45

46

## 47 Introduction

48 By 2020, roughly 22% of the world's population will be over 65, a total of approximately  
49 1.7 billion people (United Nations Department of Economic and Social Affairs, 2019). The  
50 consequences of our aging population are many, including an increasing focus on maintaining  
51 cognitive health; more so than ever before, individuals are seeking ways to keep their minds  
52 sharp. In order to be able to evaluate different tools and treatments for addressing cognitive  
53 aging, it is important that we first have a clear understanding of how cognition changes across  
54 the lifespan in average, healthy individuals. Additionally, because of the often-cited cognitive  
55 differences between women and men (Anderson et al., 2000; Feng et al., 2007; Karapetsas &  
56 Vlachos, 1997; Krikorian & Bartok, 1998), we must characterize cognition in each population; if  
57 gender differences in cognitive abilities do exist, then men and women may respond differently  
58 to cognitive aging interventions.

59 In healthy individuals, cognitive abilities develop rapidly throughout childhood  
60 (Anderson, 2002; Anderson et al., 2001a; Diamond, 2013; Rizeq et al., 2017). By 18, executive  
61 function is thought to be mature (Lee et al., 2013), although research suggests that some  
62 processes continue to develop in early adulthood (Hartshorne & Germine, 2015). Young  
63 adulthood is where most researchers agree that cognitive abilities peak; however there is large  
64 variability within this period across different cognitive functions (Anderson, 2002; Hartshorne &  
65 Germine, 2015). Mid to late adulthood is then characterized by a slow decline in most cognitive  
66 abilities (Diamond, 2013; Salthouse, 2009), and while it can be problematic, this decline is  
67 considered part of healthy aging.

68 Differences in cognitive abilities between men and women are less clear; although  
69 several gender disparities in cognitive abilities appear to exist, recent studies have found these  
70 differences to be mediated by underlying factors related to gender, such as socio-cultural  
71 factors, rather than being inherent to biological factors of sex. For example, Krinzinger and  
72 colleagues (2012) found that number processing advantages in boys were mediated by  
73 attitudes toward mathematics, and similar results have been found in young adults (Sokolowski  
74 et al., 2019). Differences in verbal processing have been less clear, with some suggesting that  
75 they are due to variability in instruction and strategy (Scheuringer et al., 2017; Scheuringer &  
76 Pletzer, 2017), and others suggesting a hormonal link (Burton et al., 2005; Griksiene &  
77 Ruksenas, 2011). Reports of gender differences in age-related cognitive decline are largely  
78 thought to be the result of cohort effects (Cornelis et al., 2019; Lipnicki et al., 2017; Wu et al.,  
79 2012), although others have found gender-specific links to brain-derived neurotrophic factor  
80 (Laing et al., 2012) and brain metabolic activity (Malpetti et al., 2017). Realistically, the truth  
81 likely lies somewhere in between, with a multifaceted interaction of biology and environment  
82 (Malpetti et al., 2017; Miller & Halpern, 2014).

83 Finally, there are a number of sociodemographic factors known to affect cognition. For  
84 example, it is generally agreed that higher socioeconomic status (SES) predicts better  
85 performance on cognitive tasks (Blums et al., 2017; Lubinski, 2009). Additionally, anxiety,  
86 depression, and substance abuse also have known detrimental effects on cognition, with higher  
87 levels of all three being associated with poorer cognitive outcomes (Crego et al., 2009;  
88 Hampshire et al., 2012; Zaremba et al., 2019). Such factors also interact with gender; women  
89 tend to experience higher levels of anxiety (McLean et al., 2011) and depression (Parker &

90 Brotchie, 2010), while men experience higher levels of substance abuse (Compton et al., 2007),  
91 although women may be more at risk specifically for alcohol abuse (Grant et al., 2017, but see  
92 Bratberg et al., 2016). Thus, there is a complex interaction of age, gender, and other  
93 sociodemographic variables that must be considered when studying cognitive abilities across  
94 the lifespan.

95 The internet provides a unique opportunity for examining cognition across the lifespan  
96 in the general population on a huge scale, allowing data to be sampled from participants from a  
97 broad range of SES, geographical, and educational backgrounds. Leveraging the power of the  
98 internet provides us with a cross-sectional snapshot of both demographics and cognition from a  
99 larger and more diverse sample than would be possible to collect in the laboratory.

100 The first goal of the present study was to characterize cognitive abilities across the  
101 lifespan, ranging from adolescence to late adulthood. Specifically, we sought to address  
102 whether differences exist between cognitive domains; do different cognitive domains show the  
103 same pattern, or are they at their peak at different ages? Do they show the same rate of  
104 decline, or do some remain resilient to aging more so than others? The second goal was to  
105 examine whether age effects differed between genders, and what factors may influence these  
106 differences. Specifically, do gender differences exist in some cognitive domains and not others?  
107 Do men and women attain their highest scores at the same age, and do they decline at the  
108 same rate? Further, we explored the demographic and social factors that affect the genders  
109 differently, and whether controlling for these differences affects the observed pattern of  
110 cognitive abilities across the lifespan. Taking into account studies of the effects of mental health  
111 and sociodemographic variables on cognition, we predicted that matching groups on these

112 factors would eliminate gender differences in cognitive abilities. However, based on smaller  
113 studies using more limited time windows, we predicted that when not controlling for these  
114 factors, gender differences would manifest with men outperforming women in memory and  
115 reasoning, but with women outperforming men in verbal abilities, and that the pattern of these  
116 abilities would show an increase up to early adulthood, and a slow decline into mid and late  
117 adulthood.

## 118 **Materials and Methods**

### 119 **Participants**

120 All data for this study were collected with the CBS ([www.](http://www.cambridgebrainsciences.com)  
121 [cambridgebrainsciences.com](http://www.cambridgebrainsciences.com)) online platform, which has previously been used for other large-  
122 scale studies of cognition (Nichols et al., 2020; Wild et al., 2018). From a database of 65,994  
123 participants, two tightly matched samples of men and women were created, with 9,451  
124 participants in each. A summary of the sample's demographics is included in Table 1. All  
125 participants gave informed consent, and ethics approval was obtained through the local  
126 Research Ethics Committee (2010.62).

### 127 **Materials**

#### 128 **Sociodemographic, lifestyle, psychological, and sleep questionnaire**

129 The sociodemographic, lifestyle, psychological, and sleep questionnaire included  
130 questions about the individual's age and gender, lifestyle such as exercise, substance use, and  
131 sleep, mental health such as depressive symptoms and anxiety, and other information such as  
132 education, employment, and level of technical savviness. When these data were collected,

133 gender was presented as a binary response (male/female), therefore we do not have  
134 information on non-binary individuals. Data included in the present study are listed in Table 1.  
135 The questions used in the present study are included in the Supplementary Material.

### 136 **Cognitive battery**

137 Prior to filling in the questionnaire, participants completed the 12 tests in the CBS  
138 battery. Test order was fixed across participants. Detailed descriptions of the tests can be found  
139 in the Supplementary Material, but in brief they are: (1) 'Monkey Ladder' (visuospatial working  
140 memory); (2) 'Grammatical Reasoning' (verbal reasoning); (3) 'Double Trouble' (a modified  
141 Stroop task); (4) 'Odd One Out' (deductive reasoning); (5) 'Spatial Span' (short-term memory);  
142 (6) 'Rotations' (mental rotation); (7) 'Feature Match' (feature-based attention and  
143 concentration); (8) 'Digit Span' (verbal working memory); (9) 'Spatial Planning' (planning and  
144 executive function); (10) 'Paired Associates' (shape-location associative memory); (11)  
145 'Interlocking Polygons' (visuospatial processing); and (12) 'Token Search' (working memory and  
146 strategy).

### 147 **Factor analysis**

148 The 12 tests were used to create three "composite" scores reflecting performance  
149 based on a previous factor analysis described in Hampshire et al. (2012). The three composite  
150 scores, labeled as short-term memory, reasoning, and verbal abilities, were calculated as  
151 follows. First, the individual test scores were normalized ( $M = 0.0$ ,  $SD = 1.0$ ). Then, the three  
152 cognitive domain scores were calculated using the formula  $Y = X(Ar^+)^T$ , where  $Y$  is the  $N \times 3$   
153 matrix of domain scores,  $X$  is the  $N \times 12$  matrix of test z-scores, and  $Ar$  is the  $12 \times 3$  matrix of

154 varimax-rotated principal component weights from Hampshire et al. All 12 tests contributed to  
155 each domain score, as determined by their component weights.

## 156 **Statistical analyses**

157 Data were analyzed in R (version 3.5.2, R Core Team, 2018) and RStudio (version  
158 1.1.463). Specific packages included: ‘Segmented’ (Muggeo, 2008) for computing regressions  
159 with breakpoints, ‘MatchIt’ (Ho et al., 2011) for matching samples on demographic variables,  
160 ‘parallel’ for parallel computing, and ‘boot’ (Canty & Ripley, 2019) for calculating confidence  
161 intervals. Figures were produced using ‘ggplot2’ (Wickham, 2016). Two groups of 9,451 men  
162 and 9,451 women were created, matched on with the nearest neighbour matching method for  
163 all variables listed in Table 1.

164 To examine the differences in demographic variables between genders, three different  
165 tests were used: Welch’s *t*-tests for continuous variables, Wilcoxon Rank Sum tests for ordinal  
166 variables, and chi-square tests for categorical variables. *P*-values were corrected for multiple  
167 comparisons using a false discovery rate and were considered significant at  $p < .01$ . Effect size  
168 was calculated using the appropriate measures for each test: Cohen’s *d* for *t*-tests, *r* for  
169 Wilcoxon Rank Sum tests, and Cramer’s *V* for chi-square tests. Measures of skew and kurtosis  
170 indicated that domain scores were normally distributed, and histograms are shown in Figure 1.

171 Segmented linear regression models were constructed to predict each of the 3 domain  
172 scores from participants’ reported age and were estimated using maximum likelihood  
173 estimation. Segmented regression was used to fit a model in which there is a change in the  
174 linear relationship – such as a “peak” that indicates a transition from increasing to decreasing  
175 performance across different ages – without imposing a pre-determined shape (e.g., quadratic



176 or cubic) through adding one or more piecewise linear relationships (Muggeo, 2003, 2008). The  
177 value of the independent variable (i.e., age) at which this change occurs is referred to as a  
178 breakpoint. The relationship between cognitive performance and age was modeled separately  
179 for each gender.

180 The segmented regression technique used here requires that the number of  
181 breakpoints, and (optionally) initial estimates of their locations, are provided. To determine the  
182 number of these points in each score, we fit each segmented regression model multiple times  
183 with one or more breakpoints and selected the model with the lowest Bayesian Information  
184 Criterion (BIC) (Muggeo, 2008; Tiwari et al., 2005). The number of breakpoints was estimated  
185 separately for each domain score and gender. The algorithm converged on consistent  
186 breakpoint locations regardless of whether initial estimates were provided (from visual  
187 inspection of local regression curves, shown in Figure S1), or not. To confirm that a model with  
188 one or more breakpoints predicted the data better than a linear model, the Davies' test (Davies,  
189 2002) was used to determine whether there was a statistically significant change in slope. The  
190 estimated breakpoint location was taken as the age that was associated with peak performance  
191 in all regression models except for two cases. First, in men's verbal scores, in which there were  
192 two breakpoints and the breakpoint with the highest score was used as the age at which  
193 performance peaked. Second, in women's reasoning scores, in which the highest score was at  
194 the lower boundary of our age range. Slopes of the increasing and decreasing segments, as well  
195 as the middle segment for men's verbal scores, were obtained using the 'slope' function of the  
196 'segmented' package, and 95% confidence intervals (CIs) were calculated for peak age, score at  
197 peak age, and all slopes.

198 Differences in these parameters between men and women were analyzed by  
199 bootstrapping with 10,000 replications the difference of the estimated parameter values from  
200 models that were separately estimated for men and women. To determine whether these  
201 values differed significantly between genders, the lower and upper 2.5% quantiles of the  
202 bootstrapped difference values were produced; if these bounds included zero, then it could be  
203 interpreted as no significant difference between the genders.

204 In segmented models where multiple breakpoints were deemed a better solution than a  
205 single point as determined using BIC, the increasing or decreasing portion of the curve (i.e., the  
206 data to the left or right of the “peak”) was characterized by two increasing or decreasing linear  
207 segments with different slopes (as can be seen in Figure 2C, women’s reasoning scores). In  
208 order to compare slopes between the genders in these cases, bootstrapping was conducted by  
209 fitting the segmented model, then calculating the average slope to the left (in the case of men’s  
210 verbal scores) or right (in the case of women’s reasoning scores) of the peak. The rest of the  
211 bootstrapping parameters were kept the same as described above.

## 212 **Secondary analyses**

213 Although matching groups on sociodemographic measures allows us to more accurately  
214 determine what the influence of gender alone is on cognitive performance, men and women do  
215 realistically differ on measures such as anxiety and sleep, and such factors are known to affect  
216 cognition. Thus, a second set of analyses were run on the full database (after cleaning of  
217 missing data and outliers, described below), to determine what differences may exist in a  
218 sample that is reflective of the sociodemographic variance we see in the population.

219 Only data from the participants who completed all questionnaire items and all 12 tests  
220 were included in analysis. 65,994 participants met these requirements. Test scores were then  
221 filtered for outliers in two passes: scores greater than six standard deviations were assumed to  
222 be technical errors and were first removed. Then, scores greater than four standard deviations  
223 from the recalculated mean were identified, assumed to be performance outliers, and  
224 removed. Finally, individuals younger than 12 and older than 69 were removed because of low  
225 numbers outside of this age range. 45,779 participants were included in the final analysis.

226 Descriptive information for these two new samples is summarized in Table S1. Scores  
227 are plotted against age in Figure S2, and histograms of domain scores are shown in Figure S3.  
228 Local regression curves are shown in Figure S4. The same set of analyses were performed as  
229 outlined in the section above, however because the total sample of men was larger than  
230 women, a random sample of 13,444 men were selected upon each bootstrap iteration in order  
231 to match the female sample size.

## 232 **Results**

### 233 **Cognitive domain scores**

#### 234 **Short-term memory**

235 Results are reported in Table 2. A model with one breakpoint was found to best  
236 estimate women's memory scores. The highest point in women's STM scores occurred at age  
237 20.42 [95% CI = 19.36, 21.48], with a score of 0.046 [95% CI = -0.009, 0.101]. The slopes of the  
238 segments to the left and right of the breakpoint were 0.036 [95% CI = 0.019, 0.053] and -0.023  
239 [95% CI = -0.025, -0.022], respectively, indicating that age was a significant predictor of STM

240 performance in these age ranges; specifically, increasing age was associated with increasing  
241 scores up to the age of 20 years, after which it was associated with decreasing performance.  
242 Davies' test for a change in slope was significant ( $p < .001$ ), indicating that the linear  
243 relationship changed at the breakpoint, as can be seen in Figure 2A.

244 Men's memory scores were also best estimated by a segmented model with one  
245 breakpoint. The highest point in men's STM score occurred at age 19.65 [95% CI = 18.61, 21.48],  
246 with a score of 0.259 [95% CI = 0.187, 0.330]. Slope of the increasing segment was 0.049 [95%  
247 CI = 0.022, 0.075], and slope of the decreasing segment was -0.025 [95% CI = -0.027, -0.023],  
248 showing a significant effect of age on STM score in men. The change in slope was significant, as  
249 measured by the Davies' test ( $p < .001$ ). As can be seen in Table 3, there was no significant  
250 difference in the age at which women and men peaked in STM performance. However, men  
251 reached a significantly higher overall score than women at their peak ages, a difference of 0.21  
252 standard deviations. When comparing how STM scores increased leading up to peak age and  
253 how quickly they declined afterward, women and men did not differ significantly.

## 254 **Verbal abilities**

255 Results of segmented regression of verbal scores are also summarized in Table 2. A  
256 model with two breakpoints was found to best estimate women's verbal scores. Women first  
257 had a breakpoint at age 16.49, at which point the rate at which scores were increasing, slowed  
258 (Figure 2B). The highest point in women's verbal scores occurred at age 24.89 [95% CI = 22.26,  
259 27.52] with a score of 0.071 [95% CI = 0.033, 0.108]. Slope of the initial increasing segment was  
260 0.153 [95% CI = 0.093, 0.214], the slope of the second increasing segment was 0.022 [95% CI =  
261 0.009, 0.035] and slope of the decreasing segment was -0.006 [95% CI = -0.008, -0.003],

262 showing a significant relationship between age and verbal abilities. Davies' test for a change in  
263 slope was significant ( $p < .001$ ), indicating that the linear relationship changed at the  
264 breakpoint.

265 Men's verbal scores were best estimated by a segmented model with two breakpoints.  
266 As can be seen in Figure 2B, men first had a breakpoint at age 17.16, at which point the rate at  
267 which scores were increasing, slowed. The highest point in men's verbal score occurred at age  
268 28.42 [95% CI = 25.33, 31.52], with a score of 0.104 [95% CI = 0.050, 0.158]. Slope of the initial  
269 increasing segment was 0.146 [95% CI = 0.094, 0.198], the slope of the second increasing  
270 segment was 0.015 [95% CI = 0.006, 0.023] and slope of the decreasing segment was -0.008  
271 [95% CI = -0.011, -0.005], indicating a significant relationship between age and verbal abilities in  
272 all three sections. The change in slope was significant, as measured by the Davies' test ( $p <$   
273  $.001$ ).

274 As summarized in Table 3, there were no significant differences in the age at which  
275 women and men's scores reached a maximum in verbal abilities, scores at peak age, nor in the  
276 slopes of the increase and decrease in scores surrounding peak age

## 277 Reasoning

278 A model with one breakpoint was again found to best estimate women's reasoning  
279 scores. However, this breakpoint occurred at age 38.12 years, and indicated a transition from a  
280 gradual to steeper decline: scores declined with a slope of -0.014 [95% CI = -0.017, -0.011] from  
281 age 12 to age 38.12, at which point the negative slope increased to -0.029 [95% CI = -0.035, -  
282 0.024]. Davies' test for a change in slope was significant ( $p < .001$ ), indicating that the linear  
283 relationship changed. As can be seen in Figure 2C, the highest predicted scores for women

284 occurred at age 12 with a score of 0.223 [95% CI = 0.187, 0.271]. However, because this is the  
285 cut-off age of our sample, it is not possible to determine whether this is indeed a true peak, or  
286 if scores are higher at earlier ages.

287 Men's reasoning scores were best estimated by a segmented model with one  
288 breakpoint. The breakpoint in men's reasoning score occurred at age 19.62 (95% CI = 17.70,  
289 21.54), with a score of 0.131 [95% CI = 0.060, 0.201]. The change in slope was significant, as  
290 measured by the Davies' test ( $p < .001$ ), however the slope of the initial segment was 0.015  
291 [95% CI = -0.012, 0.041], and slope of the decreasing segment was -0.025 [95% CI = -0.027, -  
292 0.023], indicating that only the second segment showed a significant effect of age. Similar to  
293 women, this suggests that we did not capture a developmental increase in reasoning abilities  
294 within the current sample, and it is possible that the true peak occurs earlier than age 12.

295 Because we do not have a reliable measure of peak age in either gender, we compared  
296 between genders the age at which reasoning scores began to decline. Women began to decline  
297 significantly earlier than men, however reasoning scores at that age did not differ between  
298 genders (Table 3). Because women did not show an increase in reasoning scores within our age  
299 range, we could not compare men and women on this measure. However, when comparing  
300 how scores declined after peak age, men declined significantly faster than women.

## 301 **Unmatched samples**

302 Women and men differed on several demographic factors, but not for age, education,  
303 exercise, and number of siblings. While all significant  $p$ -values were  $\leq .003$ , the largest effect  
304 sizes were seen in hours of sleep (Cohen's  $d = 0.10$ ), units of caffeine per day (Cohen's  $d = -$   
305  $0.19$ ), anxiety level (Wilcoxon's  $r = 0.15$ ), and technical savviness (Cramer's  $V = 0.24$ ).

## 306 **Short-term memory**

307 Results of the segmented regression for STM scores of both genders in the socio-  
308 demographically unmatched sample are reported in Table 4. Both women and men showed a  
309 significant change in slope as measured by the Davies' test ( $p < .001$  for both genders). As can  
310 be seen in Table 5 and Figure 3A, no significant differences were found in the age at which  
311 women and men reached the highest point in STM, nor in the slopes of the increase and  
312 decrease in scores surrounding peak age. However, men reached a higher overall score than  
313 women at their peak ages by a standard deviation of 0.28.

## 314 **Verbal abilities**

315 Both women and men showed a significant change in slope as measured by the Davies'  
316 test ( $p < .001$  in all tests). A model with a single breakpoint best estimated women's scores,  
317 while men's scores were still estimated best by a model with two breakpoints. As summarized  
318 in Table 5, men reached the highest point in verbal abilities at a significantly later age than  
319 women. Men also had significantly higher scores at peak age, with a difference of 0.05 standard  
320 deviations. When comparing how scores increased up to peak age, women's scores improved at

321 a faster rate than men's, however there was no difference when comparing the rate of decline  
322 from peak age to age 69.

### 323 Reasoning

324 Reasoning scores in our sample of women began to decrease at a significantly earlier  
325 age than men, however scores at that age did not differ between genders. While we did not  
326 capture an increase in reasoning abilities in either gender in our sample, reasoning scores  
327 decreased significantly faster in men than women (Table 5).

### 328 Discussion

329 After creating three cognitive domain scores from the 12 cognitive tests based on their  
330 underlying factor structure, we replicated previous findings that not all cognitive domains  
331 develop and decline in the same way. Specifically, STM increased rapidly from age 12 to the  
332 early 20s, at which point it decreased at a steady rate until age 69, the upper limit of our  
333 sample's age range. Verbal abilities also peaked in early adulthood, while reasoning did not  
334 show a clear peak in scores, instead being characterized by either a decline from age 12, or a  
335 plateau followed by a decline. These results were consistent with previous studies showing that  
336 cognition is not a unitary concept, and different cognitive abilities have separable  
337 developmental trajectories (Hartshorne & Germine, 2015; Salthouse, 2009). However, they  
338 extend the results of those studies in several important ways:

339 Interpreting gender differences in cognitive data is complicated by the differences in  
340 socio-demographic factors. Several factors that were matched across groups, such as sleep and  
341 anxiety, have known effects on cognitive function (Wild et al., 2018), making it difficult to



342 determine what is driving the observed gender differences in samples unmatched on these  
343 variables. Additionally, because these socio-demographic factors are gender-dependent, it is  
344 not possible to include them in the model due to issues with multicollinearity. By matching men  
345 and women on these factors, however, we were able to limit their effect on the data as much  
346 as possible, and this greatly reduced or eliminated the differences in cognitive performance and  
347 aging. Of course, there are numerous factors that we did not control for, such as reproductive  
348 health and occupation, and it is impossible to truly capture all of them. Additionally, there are  
349 socio-demographic differences that may have biological underpinnings. For example,  
350 depression is more prevalent in women, perhaps due to the presence of sex-specific forms such  
351 as premenstrual dysphoric disorder (Albert, 2015). It is therefore difficult to disentangle the  
352 environment from biological sex differences, however accounting for these differences,  
353 regardless of their origin, is necessary for describing gender differences in cognition alone.

354         While these results are presumed to be reflective of the cognitive performance in a  
355 tightly controlled sample, when examining the progression of STM, verbal abilities, and  
356 reasoning in men and women in the broader database, all three cognitive domains showed  
357 unique differences. Although men and women's scores reached peak STM performance at the  
358 same age, men reached a slightly higher score than women. In verbal abilities, women peaked  
359 faster and earlier, but men again reached higher scores. While women's reasoning began to  
360 decline earlier than men's, men declined at a faster rate. These results extend what is known  
361 from previous gender research. For example, there is evidence that men lose grey matter  
362 volume more rapidly with age than women, especially in fronto-temporal regions (Kryspin-  
363 Exner et al., 2011; A. K. H. Miller et al., 1980; Sowell et al., 2007); this in turn may lead to faster

364 decline in cognitive function, fitting the pattern observed here in the reasoning domain. In  
365 contrast, women are thought to have better verbal processing than men; however we see the  
366 opposite here, with men reaching a higher peak score than women. One possible explanation  
367 for this discrepancy could be the age at which verbal abilities are tested. Burton and colleagues  
368 (19) tested a sample of university students, which is common in Psychology research. Looking  
369 at the pattern of verbal abilities in men and women in the current unmatched sample, women  
370 seem to outperform men at age 23, which, if we were to only examine individuals around this  
371 age, may lead to the erroneous conclusion that women have superior verbal abilities. Similarly,  
372 men are frequently reported to be better at mental rotation than women (Burton et al., 2005),  
373 a test included in our reasoning domain. Here, we found that peak reasoning scores did not  
374 differ between genders, but women declined much earlier than men. Again, comparing genders  
375 within a limited age range would have led to the erroneous conclusion that men outperform  
376 women in this domain, when in reality it is a difference in trajectory of reasoning abilities. The  
377 present results underline the need to take the progression of cognitive abilities across the  
378 lifespan into account when studying gender differences.

379         As noted above, creating broader groups in terms of gender-specific differences in  
380 socio-demographic factors increased the differences in cognitive performance and aging. In the  
381 case of STM, the gender difference between peak scores increased from .21 SDs to .28 SDs.  
382 Notably, differences in verbal abilities appeared, with women reaching a peak age significantly  
383 earlier, and men having a significantly higher peak score by 0.05 of one standard deviation.  
384 However, although the gender gap was smaller (or absent) in the matched sample, this does  
385 not mean that differences in the unmatched sample should be ignored. While they may not

386 necessarily be inherent to biology, environmental influences are a part of life, and they do drive  
387 gender differences in cognitive abilities. Thus, it is reasonable to conclude that gender  
388 differences in cognition, based on biological sex alone, are minimal; however, there are notable  
389 effects of environmental factors that in turn drive gender differences in cognition.

390         One large area of disparity that remained even when controlling for environmental  
391 factors was with respect to the age at which reasoning abilities began to decline. Women  
392 declined significantly earlier than men, even when controlling for demographic factors. We  
393 were also not able to capture a reliable measure of the age at which reasoning abilities peak in  
394 either gender. In women, scores declined from 12 years of age. This could be because 12 is the  
395 age at which women's reasoning abilities do indeed peak. However, it is also possible that  
396 women peak earlier, but due to lack of data we were unable to determine the true peak from  
397 the current sample. Similarly, both unmatched and matched samples of men showed a plateau  
398 in reasoning scores until the point at which they began to decline. There are several possible  
399 explanations here. First, it is possible that men do peak in early adulthood, somewhere  
400 between 18 and 24 years of age, but the increase in reasoning abilities was not captured due to  
401 too small a sample size or noisy data. Second, they could follow a similar trajectory to women,  
402 with a slow decline before a steeper one, again not captured due to a lack of data. Because our  
403 sample of men was very large (over 32,000 in the unmatched sample), it is unlikely that either  
404 of these options are the case. Third, this plateau could be a true peak in reasoning, lasting  
405 several years, before beginning to decline. Previous research does suggest that reasoning  
406 abilities are relatively mature by age 12 (Anderson, 2002; Anderson et al., 2001b), and another  
407 large-scale study has shown that by age 18, reasoning abilities have begun to decline

408 (Salthouse, 2009). Thus, although it is not possible to confirm that decline begins around age 12  
409 in the current sample of women, the data follow a pattern that fits previous research and  
410 supports this claim.

411         The results presented here offer some insight into how to tailor interventions for  
412 cognitive decline appropriately for each gender. For example, women are known to experience  
413 more anxiety than men (McLean et al., 2011), a fact reflected in the current sample. Anxiety is  
414 known to correlate negatively with working memory (Moran, 2016). Thus, to improve working  
415 memory, or protect against its decline, therapies should perhaps focus on reducing anxiety in  
416 everyone, with a targeted focus on women. Another example is substance abuse, which is more  
417 prevalent in men (Compton et al., 2007). Because substance abuse negatively affects cognition  
418 (Crego et al., 2009), especially with respect to aging (Woods et al., 2016), a focused campaign  
419 aimed to reduce drug and alcohol consumption in men may yield a slowing in cognitive decline  
420 at the male population level. These gender-focused interventions can be combined with other  
421 treatments known to provide protection from cognitive decline, such as frequent exercise  
422 (Erickson et al., 2011) for a well-rounded defence against cognitive aging.

423 **Acknowledgements:**

424 This research was funded by a Canada Excellence Research Chair (CERC) program grant  
425 (#215063) to A.M.O., an AGE-WELL NCE and Women's Brain Health Initiative (WBHI) grant to  
426 E.S.N., a Mitacs Elevate postdoctoral fellowship to E.S.N., and NSERC Discovery Grant to A.S..  
427 A.M.O. is a CIFAR fellow.

428

429 **Declaration of Interest Statement:**

430 The cognitive tests used in this study are marketed by Cambridge Brain Sciences Inc., of which  
431 Dr. Owen is the Chief Scientific Officer. Under the terms of the existing licensing agreement, Dr.  
432 Owen and his collaborators are free to use the platform at no cost for their scientific studies  
433 and such research projects neither contribute to, nor are influenced by, the activities of the  
434 company. As such, there is no overlap between the current study and the activities of  
435 Cambridge Brain Sciences Inc., nor was there any cost to the authors, funding bodies or  
436 participants who were involved in the study.

## 437 **References**

- 438 Albert, P. R. (2015). Why is depression more prevalent in women? *Journal of Psychiatry and*  
439 *Neuroscience*, 40(4), 219–221. <https://doi.org/10.1503/jpn.150205>
- 440 Anderson, P. (2002). Assessment and Development of Executive Function (EF) During  
441 Childhood. *Child Neuropsychology*, 8(2), 71–82. <https://doi.org/10.1076/chin.8.2.71.8724>
- 442 Anderson, P., Anderson, V., Northam, E., & Taylor, H. G. (2000). Standardization of the  
443 Contingency Naming Test (CNT) for school-age children: a measure of reactive flexibility.  
444 *Clinical Neuropsychological Assessment*, 1, 247–273.  
445 [http://scholar.google.com/scholar?hl=en&btnG=Search&q=intitle:Standardization+of+the](http://scholar.google.com/scholar?hl=en&btnG=Search&q=intitle:Standardization+of+the+Contingency+NamingTest+(CNT)+for+school+aged+children:+A+measure+of+reactive+flexibility#0)  
446 [+Contingency+NamingTest+\(CNT\)+for+school+aged+children:+A+measure+of+reactive+fle](http://scholar.google.com/scholar?hl=en&btnG=Search&q=intitle:Standardization+of+the+Contingency+NamingTest+(CNT)+for+school+aged+children:+A+measure+of+reactive+flexibility#0)  
447 [xibility#0](http://scholar.google.com/scholar?hl=en&btnG=Search&q=intitle:Standardization+of+the+Contingency+NamingTest+(CNT)+for+school+aged+children:+A+measure+of+reactive+flexibility#0)
- 448 Anderson, V., Anderson, P., Northam, E., Jacobs, R., & Catroppa, C. (2001a). Development of  
449 Executive Functions Through Late Childhood and Adolescence in an Australian Sample.  
450 *Developmental Neuropsychology*, 20(1), 385–406.  
451 <https://doi.org/10.1207/S15326942DN2001>
- 452 Anderson, V., Anderson, P., Northam, E., Jacobs, R., & Catroppa, C. (2001b). Developmental  
453 Neuropsychology Differential Development of Attention and Executive Functions in 3- to  
454 12-Year-Old Finnish Children. *Developmental Neuropsychology*, 20(1), 385–406.  
455 <https://doi.org/10.1207/S15326942DN2001>
- 456 Blums, A., Belsky, J., Grimm, K., & Chen, Z. (2017). Building Links Between Early Socioeconomic  
457 Status, Cognitive Ability, and Math and Science Achievement. *Journal of Cognition and*  
458 *Development*, 18(1), 16–40. <https://doi.org/10.1080/15248372.2016.1228652>

- 459 Bratberg, G. H., Wilsnack, S. C., Wilsnack, R., Håvås Haugland, S., Krokstad, S., Sund, E. R., &  
460 Bjørngaard, J. H. (2016). Gender differences and gender convergence in alcohol use over  
461 the past three decades (1984-2008), the HUNT Study, Norway. *BMC Public Health*, *16*(1),  
462 1–12. <https://doi.org/10.1186/s12889-016-3384-3>
- 463 Burton, L. A., Henninger, D., & Hafetz, J. (2005). Gender differences in relations of mental  
464 rotation, verbal fluency, and SAT scores to finger length ratios as hormonal indexes.  
465 *Developmental Neuropsychology*, *28*(1), 493–505.  
466 [https://doi.org/10.1207/s15326942dn2801\\_3](https://doi.org/10.1207/s15326942dn2801_3)
- 467 Canty, A., & Ripley, B. (2019). boot: Bootstrap R(S-Plus) Functions. *R Package Version 1.3-20*.
- 468 Compton, W., Thomas, Y. F., Stinson, F. S., & Grant, B. F. (2007). Prevalence, Correlates,  
469 Disability, and Comorbidity of DSM-IV Drug Abuse and Dependence in the United States.  
470 *Archives of General Psychiatry*, *64*, 566–576.  
471 [http://www.pubmedcentral.nih.gov/articlerender.fcgi?artid=2707116&tool=pmcentrez&r](http://www.pubmedcentral.nih.gov/articlerender.fcgi?artid=2707116&tool=pmcentrez&rendertype=abstract)  
472 [endertype=abstract](http://www.pubmedcentral.nih.gov/articlerender.fcgi?artid=2707116&tool=pmcentrez&rendertype=abstract)
- 473 Cornelis, M. C., Wang, Y., Holland, T., Agarwal, P., Weintraub, S., & Morris, M. C. (2019). Age  
474 and cognitive decline in the UK Biobank. *PLoS ONE*, *14*(3), 1–16.  
475 <https://doi.org/10.1371/journal.pone.0213948>
- 476 Crego, A., Holguín, S. R., Parada, M., Mota, N., Corral, M., & Cadaveira, F. (2009). Binge drinking  
477 affects attentional and visual working memory processing in young university students.  
478 *Alcoholism: Clinical and Experimental Research*, *33*(11), 1870–1879.  
479 <https://doi.org/10.1111/j.1530-0277.2009.01025.x>
- 480 Davies, R. B. (2002). Hypothesis Testing when a Nuisance Parameter is Present Only Under the

- 481 Alternatives Published by: Oxford University Press on behalf of Biometrika Trust Stable  
482 URL: <http://www.jstor.org/stable/2336019> Your use of the JSTOR archive indica.  
483 *Biometrika*, 89(2), 484–489.
- 484 Diamond, A. (2013). Executive Function. *Annual Review of Psychology*, 64, 135–168.  
485 <https://doi.org/10.1016/B978-0-12-385157-4.01147-7>
- 486 Erickson, K. I., Voss, M. W., Prakash, R. S., Basak, C., Szabo, A., Chaddock, L., Kim, J. S., Heo, S.,  
487 Alves, H., White, S. M., Wojcicki, T. R., Mailey, E., Vieira, V. J., Martin, S. A., Pence, B. D.,  
488 Woods, J. A., McAuley, E., & Kramer, A. F. (2011). Exercise training increases size of  
489 hippocampus and improves memory. *Proceedings of the National Academy of Sciences*,  
490 108(7), 3017–3022. <https://doi.org/10.1073/pnas.1015950108>
- 491 Feng, J., Spence, I., & Pratt, J. (2007). Playing an Action Video Game in Reduces Gender  
492 Differences Spatial Cognition. *Psychological Science*, 18(10), 850–855.
- 493 Grant, B. F., Chou, S. P., Saha, T. D., Pickering, R. P., Kerridge, B. T., Ruan, W. J., Huang, B., Jung,  
494 J., Zhang, H., Fan, A., & Hasin, D. S. (2017). Prevalence of 12-month alcohol use, high-risk  
495 drinking, and DSM-IV alcohol use disorder in the United States, 2001-2002 to 2012-2013:  
496 Results from the National Epidemiologic Survey on Alcohol and Related Conditions. *JAMA*  
497 *Psychiatry*, 74(9), 911–923. <https://doi.org/10.1001/jamapsychiatry.2017.2161>
- 498 Griksiene, R., & Ruksenas, O. (2011). Effects of hormonal contraceptives on mental rotation and  
499 verbal fluency. *Psychoneuroendocrinology*, 36(8), 1239–1248.  
500 <https://doi.org/10.1016/j.psyneuen.2011.03.001>
- 501 Hampshire, A., Highfield, R. R., Parkin, B. L., & Owen, A. M. (2012). Fractionating Human  
502 Intelligence. *Neuron*, 76(6), 1225–1237. <https://doi.org/10.1016/j.neuron.2012.06.022>



- 503 Hartshorne, J. K., & Germine, L. T. (2015). When Does Cognitive Functioning Peak? The  
504 Asynchronous Rise and Fall of Different Cognitive Abilities Across the Life Span.  
505 *Psychological Science*, 26(4), 433–443. <https://doi.org/10.1177/0956797614567339>
- 506 Ho, D. E., Imai, K., King, G., & Stuart, E. A. (2011). MatchIt: Nonparametric Preprocessing for.  
507 *Journal Of Statistical Software*, 42(8), 1–28. <http://www.jstatsoft.org/v42/i08>
- 508 Karapetsas, A. B., & Vlachos, F. M. (1997). Sex and Handedness in Development of Visuomotor  
509 Skills. *Perceptual and Motor Skills*, 85, 131–140. <https://doi.org/10.2466/pms.85.5.131-140>
- 510 Krikorian, R., & Bartok, J. A. (1998). Developmental Data for the Porteus Maze Test. *The Clinical*  
511 *Neuropsychologist*, 12(3), 305–310. <https://doi.org/10.1076/clin.12.3.305.1984>
- 512 Krinzinger, H., Wood, G., & Willmes, K. (2012). What accounts for individual and gender  
513 differences in the multi-digit number processing of primary school children? *Zeitschrift Fur*  
514 *Psychologie / Journal of Psychology*, 220(2), 78–89. [https://doi.org/10.1027/2151-](https://doi.org/10.1027/2151-2604/a000099)  
515 [2604/a000099](https://doi.org/10.1027/2151-2604/a000099)
- 516 Kryspin-Exner, I., Lamplmayr, E., & Felnhofer, A. (2011). Geropsychology: The gender gap in  
517 human aging-a mini-review. *Gerontology*, 57(6), 539–548.  
518 <https://doi.org/10.1159/000323154>
- 519 Laing, K. R., Mitchell, D., Wersching, H., Czira, M. E., Berger, K., & Baune, B. T. (2012). Brain-  
520 derived neurotrophic factor (BDNF) gene: A gender-specific role in cognitive function  
521 during normal cognitive aging of the MEMO-Study? *Age*, 34(4), 1011–1022.  
522 <https://doi.org/10.1007/s11357-011-9275-8>
- 523 Lee, K., Bull, R., & Ho, R. (2013). Developmental Changes in Executive Functioning. *Child*  
524 *Development*, 84(6), 1933–1953. <https://doi.org/10.1111/cdev.12096>

- 525 Lipnicki, D. M., Crawford, J. D., Dutta, R., Thalamuthu, A., Kochan, N. A., Andrews, G., Lipnicki,  
526 D. M., Crawford, J. D., Dutta, R., Thalamuthu, A., Kochan, N. A., Andrews, G., Lima-costa, F.,  
527 Castro-costa, E., Brayne, C., Matthews, F. E., Stephan, B. C. M., Lipton, R. B., Mindy, J., ...  
528 Dardiotis, E. (2017). Age-related cognitive decline and associations with sex, education and  
529 apolipoprotein E genotype across ethnocultural groups and geographic regions: a  
530 collaborative cohort study. *PLoS Medicine*, *14*(3).
- 531 Lubinski, D. (2009). Cognitive epidemiology: With emphasis on untangling cognitive ability and  
532 socioeconomic status. *Intelligence*, *37*(6), 625–633.  
533 <https://doi.org/10.1016/j.intell.2009.09.001>
- 534 Malpetti, M., Ballarini, T., Presotto, L., Garibotto, V., Tettamanti, M., & Perani, D. (2017).  
535 Gender differences in healthy aging and Alzheimer’s Dementia: A 18F-FDG-PET study of  
536 brain and cognitive reserve. *Human Brain Mapping*, *38*(8), 4212–4227.  
537 <https://doi.org/10.1002/hbm.23659>
- 538 McLean, C. P., Asnaani, A., Litz, B. T., & Hofmann, S. G. (2011). Gender differences in anxiety  
539 disorders: Prevalence, course of illness, comorbidity and burden of illness. *Journal of*  
540 *Psychiatric Research*, *45*(8), 1027–1035. <https://doi.org/10.1016/j.jpsychires.2011.03.006>
- 541 Miller, A. K. H., Alston, R. L., & Corsellis, J. A. N. (1980). Variation with age in the volumes of  
542 grey and white matter in the cerebral hemispheres of man: measurements with an image  
543 analyser. *Neuropathology and Applied Neurobiology*, *6*(2), 119–132.  
544 <https://doi.org/doi:10.1111/j.1365-2990.1980.tb00283.x>
- 545 Miller, D. I., & Halpern, D. F. (2014). The new science of cognitive sex differences. *Trends in*  
546 *Cognitive Sciences*, *18*(1), 37–45. <https://doi.org/10.1016/j.tics.2013.10.011>

- 547 Moran, T. P. (2016). Anxiety and Working Memory Capacity: A Meta-Analysis and Narrative  
548 Review. *Psychological Bulletin*, 142(5). <https://doi.org/10.1037/bul0000051.supp>
- 549 Muggeo, V. M. R. (2003). Estimating regression models with unknown break-points. *Statistics in*  
550 *Medicine*, 22(19), 3055–3071. <https://doi.org/10.1002/sim.1545>
- 551 Muggeo, V. M. R. (2008). segmented: An R package to fit regression models with broken-line  
552 relationships. *R News*, 8(1), 20–25. <https://doi.org/http://dx.doi.org/10.1192/bjp.195.1.A6>
- 553 Nichols, E. S., Wild, C. J., Stojanoski, B., Battista, M. E., & Owen, A. M. (2020). Bilingualism  
554 Affords No General Cognitive Advantages: A Population Study of Executive Function in  
555 11,000 People. *Psychological Science*, 1–20. <https://doi.org/10.1177/0956797620903113>
- 556 Parker, G., & Brotchie, H. (2010). Gender differences in depression. *International Review of*  
557 *Psychiatry*, 22(5), 429–436. <https://doi.org/10.3109/09540261.2010.492391>
- 558 Rizeq, J., Flora, D. B., & Toplak, M. E. (2017). Changing relations among cognitive abilities across  
559 development: implications for measurement and research. *Clinical Neuropsychologist*,  
560 31(8), 1353–1374. <https://doi.org/10.1080/13854046.2017.1317034>
- 561 Salthouse, T. A. (2009). When does age-related cognitive decline begin? *Neurobiology of Aging*,  
562 30(4), 507–514. <https://doi.org/10.1016/j.neurobiolaging.2008.09.023>
- 563 Scheuringer, A., & Pletzer, B. (2017). Sex differences and menstrual cycle dependent changes in  
564 cognitive strategies during spatial navigation and verbal fluency. *Frontiers in Psychology*,  
565 8(MAR), 1–12. <https://doi.org/10.3389/fpsyg.2017.00381>
- 566 Scheuringer, A., Wittig, R., & Pletzer, B. (2017). Sex differences in verbal fluency: the role of  
567 strategies and instructions. *Cognitive Processing*, 18(4), 407–417.  
568 <https://doi.org/10.1007/s10339-017-0801-1>

- 569 Sokolowski, H. M., Hawes, Z., & Lyons, I. M. (2019). What explains sex differences in math  
570 anxiety? A closer look at the role of spatial processing. *Cognition*, *182*(October 2018), 193–  
571 212. <https://doi.org/10.1016/j.cognition.2018.10.005>
- 572 Sowell, E. R., Peterson, B. S., Kan, E., Woods, R. P., Yoshii, J., Bansal, R., Xu, D., Zhu, H.,  
573 Thompson, P. M., & Toga, A. W. (2007). Sex differences in cortical thickness mapped in 176  
574 healthy individuals between 7 and 87 years of age. *Cerebral Cortex*, *17*(7), 1550–1560.  
575 <https://doi.org/10.1093/cercor/bhl066>
- 576 Tiwari, R. C., Cronin, K. A., Davis, W., Feuer, E. J., Yu, B., & Chib, S. (2005). Bayesian model  
577 selection for joint point regression with application to age-adjusted cancer rates. *Journal of*  
578 *the Royal Statistical Society. Series C: Applied Statistics*, *54*(5), 919–939.  
579 <https://doi.org/10.1111/j.1467-9876.2005.00518.x>
- 580 United Nations Department of Economic and Social Affairs. (2019). *World Population Prospects*  
581 *2019: Highlights* (Issue June).
- 582 Wickham, H. (2016). *ggplot2: Elegant Graphics for Data Analysis*. Springer-Verlag New York.
- 583 Wild, C. J., Nichols, E. S., Battista, M. E., Stojanoski, B., & Owen, A. M. (2018). Dissociable effect  
584 of self-reported daily sleep duration on high-level cognitive abilities. *Sleep*, *41*(12), 1–11.  
585 <https://doi.org/10.1093/sleep/zsy182>
- 586 Woods, A. J., Porges, E. C., Bryant, V. E., Seider, T., Gongvatana, A., Kahler, C. W., de la Monte,  
587 S., Monti, P. M., & Cohen, R. A. (2016). Current Heavy Alcohol Consumption is Associated  
588 with Greater Cognitive Impairment in Older Adults. *Alcoholism: Clinical and Experimental*  
589 *Research*, *40*(11), 2435–2444. <https://doi.org/10.1111/acer.13211>
- 590 Wu, Y., Zhang, D., Pang, Z., Oksuzyan, A., Jiang, W., Wang, S., Li, S., Kruse, T., Christensen, K., &

591 Tan, Q. (2012). Gender-specific patterns in age-related decline in general health among  
592 Danish and Chinese: A cross-national comparative study. *Geriatrics and Gerontology*  
593 *International*, 12(3), 431–439. <https://doi.org/10.1111/j.1447-0594.2011.00784.x>  
594 Zaremba, D., Schulze Kalthoff, I., Förster, K., Redlich, R., Grotegerd, D., Leehr, E. J., Meinert, S.,  
595 Dohm, K., Bürger, C., Enneking, V., Böhnlein, J., Repple, J., Opel, N., Jörgens, S., Yüksel, D.,  
596 Schmitt, S., Stein, F., Kircher, T., Krug, A., ... Dannlowski, U. (2019). The effects of  
597 processing speed on memory impairment in patients with major depressive disorder.  
598 *Progress in Neuro-Psychopharmacology and Biological Psychiatry*, 92(November 2018),  
599 494–500. <https://doi.org/10.1016/j.pnpbp.2019.02.015>  
600

## 601 Tables

**Table 1. Comparison of demographic variables across women and men**

| Measure                     | Mean (SD) or Percentage |               | $\chi^2$ (df, N) or $t$ (df) | $p$  | Cohen's $d$ | BF <sub>10</sub>    |
|-----------------------------|-------------------------|---------------|------------------------------|------|-------------|---------------------|
|                             | Women                   | Men           |                              |      |             |                     |
| N                           | 9,451                   | 9,451         |                              |      |             |                     |
| Age (years)                 | 28.14 (10.95)           | 28.28 (10.65) | -1.31(23696)                 | .902 | 0.01        | 0.02                |
| Highest education completed |                         |               | 10.18(4, $N = 18,902$ )      | .281 | 0.05        | 9.06e <sup>-5</sup> |
| Some high school            | 9.70%                   | 11.00%        |                              |      |             |                     |
| High School                 | 8.30%                   | 8.50%         |                              |      |             |                     |
| Some post-secondary         | 28.00%                  | 27.50%        |                              |      |             |                     |
| Post-secondary degree       | 27.80%                  | 27.10%        |                              |      |             |                     |
| Professional degree         | 26.10%                  | 25.80%        |                              |      |             |                     |
| Level of employment         |                         |               | 6.57(5, $N = 18,902$ )       | .902 | 0.04        | 4.76e <sup>-7</sup> |
| No answer                   | 3.70%                   | 4.10%         |                              |      |             |                     |
| Unemployed                  | 10.50%                  | 11.40%        |                              |      |             |                     |
| Full time student           | 27.90%                  | 27.60%        |                              |      |             |                     |
| Employed and student        | 14.90%                  | 14.60%        |                              |      |             |                     |
| Employed part time          | 9.00%                   | 9.20%         |                              |      |             |                     |
| Employed full time          | 34.00%                  | 33.10%        |                              |      |             |                     |
| Exercise                    |                         |               | 4.07(4, $N = 18,902$ )       | .902 | 0.03        | 3.77e <sup>-6</sup> |
| Never                       | 10.40%                  | 11.00%        |                              |      |             |                     |
| Infrequently                | 36.40%                  | 36.90%        |                              |      |             |                     |

|                          |             |             |                      |      |        |                      |
|--------------------------|-------------|-------------|----------------------|------|--------|----------------------|
| Weekly                   | 19.80%      | 19.80%      |                      |      |        |                      |
| Several times a week     | 26.60%      | 25.80%      |                      |      |        |                      |
| Every day                | 6.90%       | 6.50%       |                      |      |        |                      |
| Sleep (hours last night) | 7.02 (1.62) | 7.01 (1.63) | 0.40(18,899)         | .914 | -0.01  | 0.02                 |
| Alcohol (units per week) | 1.72 (1.76) | 1.71 (1.76) | 0.25 (18,900)        | .914 | <-0.01 | 4.14e <sup>-23</sup> |
| Caffeine (units per day) | 3.47 (4.80) | 3.52 (4.82) | -0.61 (18,900)       | .902 | 0.01   | 0.02                 |
| Cigarettes (per day)     | 1.53 (4.63) | 1.68 (5.06) | -2.24 (18,749)       | .281 | 0.03   | 0.20                 |
| Depressive feelings      |             |             | 2.19 (5, N = 18,902) | .914 | 0.02   | 1.35e <sup>-8</sup>  |
| No answer                | 1.10%       | 1.30%       |                      |      |        |                      |
| Never                    | 10.90%      | 11.10%      |                      |      |        |                      |
| Occasionally             | 57.00%      | 56.60%      |                      |      |        |                      |
| Quite often              | 20.80%      | 20.60%      |                      |      |        |                      |
| Nearly every day         | 7.30%       | 7.40%       |                      |      |        |                      |
| All the time             | 3.00%       | 3.00%       |                      |      |        |                      |
| Anxiety                  |             |             | 1.52 (5, N = 18,902) | .914 | 0.02   | 1.50e <sup>-8</sup>  |
| No answer                | 1.20%       | 1.40%       |                      |      |        |                      |
| Never                    | 14.00%      | 13.60%      |                      |      |        |                      |
| Occasionally             | 50.20%      | 50.30%      |                      |      |        |                      |
| Quite often              | 20.00%      | 20.20%      |                      |      |        |                      |
| Nearly every day         | 10.00%      | 9.90%       |                      |      |        |                      |
| All the time             | 4.50%       | 4.50%       |                      |      |        |                      |
| Tech savvy               |             |             | 0.02(1, N = 18,902)  | .914 | <0.01  | 0.02                 |
| Yes                      | 76.80%      | 76.70%      |                      |      |        |                      |
| No                       | 23.20%      | 23.30%      |                      |      |        |                      |
| Video games              |             |             | 4.67(3, N = 18,902)  | .902 | 0.03   | 1.77e <sup>-4</sup>  |
| Never                    | 33.80%      | 32.50%      |                      |      |        |                      |

|                      |        |        |                        |      |      |              |
|----------------------|--------|--------|------------------------|------|------|--------------|
| Monthly              | 26.50% | 26.40% |                        |      |      |              |
| Weekly               | 23.50% | 24.30% |                        |      |      |              |
| Daily                | 16.20% | 16.80% |                        |      |      |              |
| Political leaning    |        |        | 1.29(2, $N = 18,902$ ) | .902 | 0.02 | $6.63e^{-4}$ |
| Liberal              | 47.40% | 47.00% |                        |      |      |              |
| Middle               | 44.60% | 44.60% |                        |      |      |              |
| Conservative         | 7.90%  | 8.40%  |                        |      |      |              |
| Religiosity          |        |        | 0.97(4, $N = 18,902$ ) | .914 | 0.01 | $6.71e^{-7}$ |
| Atheist              | 33.50% | 33.10% |                        |      |      |              |
| Agnostic             | 32.10% | 32.10% |                        |      |      |              |
| Religious lapsed     | 18.70% | 18.70% |                        |      |      |              |
| Religious practicing | 11.90% | 12.00% |                        |      |      |              |
| Very religious       | 3.90%  | 4.10%  |                        |      |      |              |
| Siblings             |        |        | 2.30(3, $N = 18,902$ ) | .902 | 0.02 | $4.64e^{-5}$ |
| Only child           | 12.40% | 12.40% |                        |      |      |              |
| Youngest             | 30.30% | 30.50% |                        |      |      |              |
| Middle               | 16.50% | 17.20% |                        |      |      |              |
| Oldest               | 40.80% | 39.90% |                        |      |      |              |

---

Note. Welch's  $t$ -test used to compare numeric variables; all other tests used  $\chi^2$ .

602

603

604

605

606



607

**Table 2: Segmented regression parameter estimates for age, from regression models estimated for each composite score**

| Score     | Gender | Term  | Coef  | SE    | <i>t</i> | <i>p</i> |
|-----------|--------|-------|-------|-------|----------|----------|
| STM       | Women  | Age   | 0.04  | 0.01  | 4.10     | < .001   |
|           |        | ΔAge  | -0.06 |       |          |          |
|           | Men    | Age   | 0.05  | 0.01  | 3.61     | < .001   |
|           |        | ΔAge  | -0.07 |       |          |          |
| Verbal    | Women  | Age   | 0.15  | 0.01  | 7.58     | < .001   |
|           |        | ΔAge1 | -0.13 |       |          |          |
|           |        | ΔAge2 | -0.03 |       |          |          |
|           | Men    | Age   | 0.15  | 0.03  | 5.36     | < .001   |
|           |        | ΔAge1 | -0.13 |       |          |          |
|           |        | ΔAge2 | -0.02 |       |          |          |
| Reasoning | Women  | Age   | -0.01 | 0.001 | -8.83    | < .001   |
|           |        | ΔAge  | -0.02 |       |          |          |
|           | Men    | Age   | 0.01  | 0.01  | 1.10     | .272     |
|           |        | ΔAge  | -0.04 |       |          |          |

Note: *p*-values for change in slope measured by Davies' test; ΔAge refers to

change in age parameter after a breakpoint

608

609

**Table 3: Comparisons between genders matched on socio-demographic variables**

| Score     | Measure    | Women [95% CI]                       | Men [95% CI]                      | Difference [95% CI]    |
|-----------|------------|--------------------------------------|-----------------------------------|------------------------|
| STM       | Peak age   | 20.42 [19.36, 21.48]                 | 19.65 [18.61, 20.69]              | 0.76 [-2.09, 4.32]     |
|           | Peak score | 0.046 [-0.009, 0.101]                | 0.259 [0.187, 0.330]              | -0.213 [-2.63, -0.159] |
|           | Increase   | 0.036 [0.019, 0.053]                 | 0.049 [0.022, 0.075]              | -0.013 [-0.132, 0.028] |
|           | Decrease   | -0.023 [-0.025, -0.022]              | -0.025 [-0.027, -0.023]           | 0.002 [-0.001, 0.005]  |
| Verbal    | Peak age   | 24.89 [22.26, 27.52]                 | 28.42 [25.33, 31.52]              | -3.53 [-20.49, 6.10]   |
|           | Peak score | 0.071 [0.033, 0.108]                 | 0.104 [0.050, 0.158]              | -0.033 [-0.091, 0.019] |
|           | Increase   | 0.035 [0.016, 0.048] <sup>a</sup>    | 0.022 [0.006, 0.045] <sup>a</sup> | 0.013 [-0.012, 0.036]  |
|           | Decrease   | -0.006 [-0.008, -0.003]              | -0.008 [-0.011, -0.005]           | 0.002 [-0.003, 0.014]  |
| Reasoning | Peak age   | 12                                   | 19.62 [17.70, 21.54]              | -7.62 [-12.82, -2.23]  |
|           | Peak score | 0.223 [0.187, 0.271]                 | 0.131 [0.060, 0.201]              | 0.092 [-0.047, 0.151]  |
|           | Increase   | –                                    | 0.015 [-0.012, 0.041]             | –                      |
|           | Decrease   | -0.020 [-0.021, -0.018] <sup>a</sup> | -0.025 [-0.027, -0.023]           | 0.005 [0.003, 0.008]   |

<sup>a</sup> Combined slope across two segments is reported.

610

611

**Table 4: Segmented regression parameter estimates for age, from regression models estimated for each composite score, for models estimated with N = 45,779**

| Score     | Gender | Term  | Coef  | SE    | <i>t</i> | <i>p</i> |
|-----------|--------|-------|-------|-------|----------|----------|
| STM       | Women  | Age   | 0.03  | 0.01  | 3.83     | < .001   |
|           |        | ΔAge  | -0.05 |       |          |          |
|           | Men    | Age   | 0.04  | 0.01  | 6.48     | < .001   |
|           |        | ΔAge  | -0.07 |       |          |          |
| Verbal    | Women  | Age   | 0.04  | 0.01  | 8.16     | < .001   |
|           |        | ΔAge  | -0.05 |       |          |          |
|           | Men    | Age   | 0.10  | 0.01  | 8.44     | < .001   |
|           |        | ΔAge1 | -0.09 |       |          |          |
|           |        | ΔAge2 | -0.02 |       |          |          |
| Reasoning | Women  | Age   | -0.01 | 0.001 | -9.62    | < .001   |
|           |        | ΔAge  | -0.01 |       |          |          |
|           | Men    | Age   | 0.003 | 0.004 | 0.73     | .468     |
|           |        | ΔAge  | -0.03 |       |          |          |

Note: *p*-values for change in slope measured by Davies' test; ΔAge refers to change in age parameter after the breakpoint

612

613

**Table 5: Comparisons between genders on key measures of cognitive performance over the lifetime, for models estimated with N = 45,779**

| Score     | Measure          | Women [95% CI] |                               | Men [95% CI] |                             | Difference [95% CI] |                  |
|-----------|------------------|----------------|-------------------------------|--------------|-----------------------------|---------------------|------------------|
| STM       | Peak age         | 20.47          | [19.39, 21.55]                | 20.48        | [19.85, 21.12]              | -0.01               | [-4.70, 3.44]    |
|           | Peak score       | 0.021          | [-0.007, 0.049]               | 0.304        | [0.286, 0.323]              | -0.283              | [-0.331, -0.219] |
|           | Increasing slope | 0.032          | [0.015, 0.048]                | 0.042        | [0.029, 0.054]              | 0.010               | [-0.071, 0.036]  |
|           | Decreasing slope | -0.023         | [-0.025, -0.021]              | -0.024       | [-0.025, -0.023]            | 0.001               | [-0.002, 0.005]  |
| Verbal    | Peak age         | 23.21          | [22.00, 24.42]                | 39.20        | [35.99, 42.42]              | -15.99              | [-26.36, -3.86]  |
|           | Peak score       | 0.067          | [0.033, 0.101]                | 0.116        | [0.074, 0.157]              | -0.049              | [-0.145, -0.002] |
|           | Increasing slope | 0.042          | [0.032, 0.052]                | 0.014        | [0.007, 0.027] <sup>a</sup> | 0.028               | [0.012, 0.176]   |
|           | Decreasing slope | -0.006         | [-0.008, -0.004]              | -0.013       | [-0.017, -0.009]            | 0.007               | [-0.001, 0.019]  |
| Reasoning | Peak age         | 12             |                               | 23.51        | [22.25, 24.78]              | -11.51              | [-16.96, -4.22]  |
|           | Peak score       | 0.208          | [0.168, 0.249]                | 0.196        | [0.163, 0.228]              | 0.012               | [-0.136, 0.046]  |
|           | Increasing slope | –              |                               | 0.003        | [-0.004, 0.010]             | –                   |                  |
|           | Decreasing slope | -0.019         | [-0.021, -0.018] <sup>a</sup> | -0.027       | [-0.029, -0.026]            | 0.008               | [0.004, 0.012]   |

Note: Values are missing for women's reasoning increasing slope as both segments were negative

<sup>a</sup> Combined slope across two segments is reported. Slopes of the individual segments are reported in-text.

614

615 **Figures**

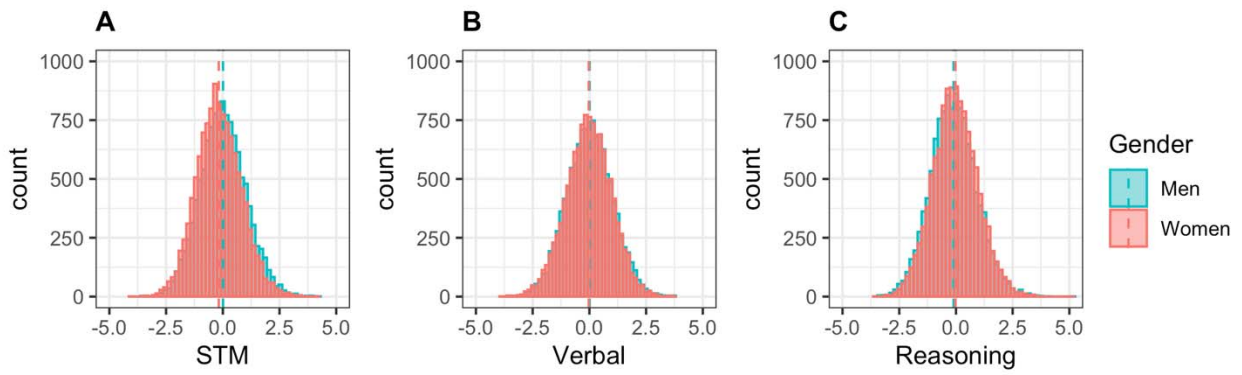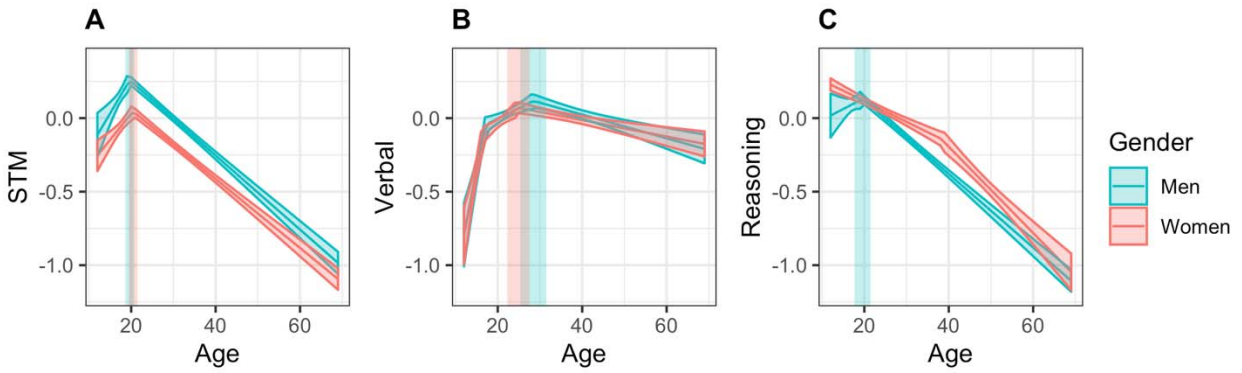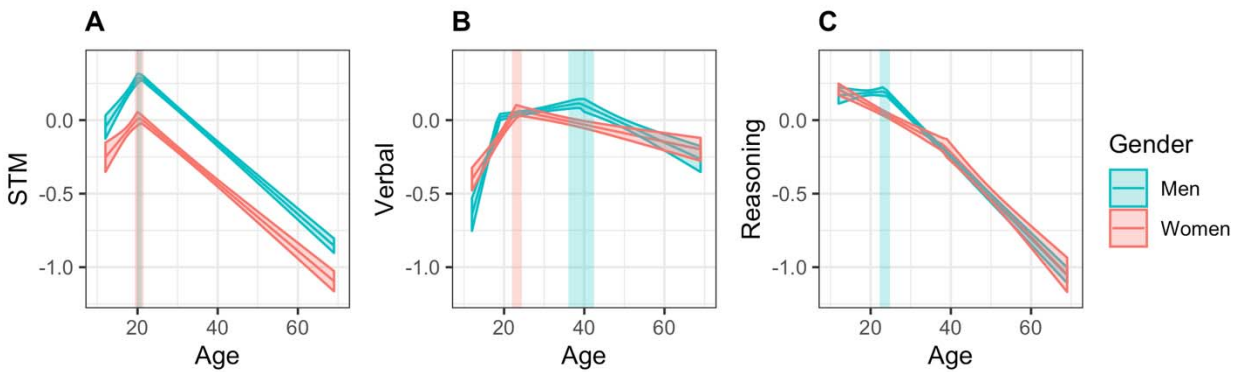

623 **Figure captions**

624 **Figure 1. Histograms of domain scores by gender.** Dashed lines indicate mean.

625 **Figure 2. Regression lines for STM, Verbal, and Reasoning scores across the lifespan, ranging**  
626 **from 12 to 69 years of age.** 95% simultaneous confidence bands are shown in translucent  
627 colour around the line, and 95% confidence intervals for peak age are shown in translucent  
628 rectangles.

629 **Figure 3. Regression lines for STM, Verbal, and Reasoning scores across the lifespan, ranging**  
630 **from 12 to 69 years of age, in the socio-demographically unmatched sample.** 95%  
631 simultaneous confidence bands are shown in translucent colour around the line, and 95%  
632 confidence intervals for peak age are shown in translucent rectangles.
